# Supplementary material for: Dialogues between nurses, patients with heart failure and their partners during a dyadic psychoeducational intervention: a qualitative study
Source: PubMed Central journal article supplement — BMJ Open. 2017 Dec 14;7(12):e018236. doi: 10.1136/bmjopen-2017-018236 (PMC5736023; doi:10.1136/bmjopen-2017-018236), 2017-12-14
Supplement: bmjopen-2017-018236.draft_revisions.pdf [file bmjopen-2017-018236.draft_revisions.pdf]

# BMJ Open

BMJ Open is committed to open peer review. As part of this commitment we make the peer review history of every article we publish publicly available.

When an article is published we post the peer reviewers' comments and the authors' responses online. We also post the versions of the paper that were used during peer review. These are the versions that the peer review comments apply to.

The versions of the paper that follow are the versions that were submitted during the peer review process. They are not the versions of record or the final published versions. They should not be cited or distributed as the published version of this manuscript.

BMJ Open is an open access journal and the full, final, typeset and author-corrected version of record of the manuscript is available on our site with no access controls, subscription charges or pay-per-view fees (<http://bmjopen.bmj.com>).

If you have any questions on BMJ Open's open peer review process please email [info.bmjopen@bmj.com](mailto:info.bmjopen@bmj.com)

# BMJ Open

## Dialogues between nurses, patients with heart failure and their partners during a dyadic psychoeducational intervention – a qualitative study

|                                 |                                                                                                                                                                                                                                                                                                                                                                                                                                                                                                                            |
|---------------------------------|----------------------------------------------------------------------------------------------------------------------------------------------------------------------------------------------------------------------------------------------------------------------------------------------------------------------------------------------------------------------------------------------------------------------------------------------------------------------------------------------------------------------------|
| Journal:                        | <i>BMJ Open</i>                                                                                                                                                                                                                                                                                                                                                                                                                                                                                                            |
| Manuscript ID                   | bmjopen-2017-018236                                                                                                                                                                                                                                                                                                                                                                                                                                                                                                        |
| Article Type:                   | Research                                                                                                                                                                                                                                                                                                                                                                                                                                                                                                                   |
| Date Submitted by the Author:   | 16-Jun-2017                                                                                                                                                                                                                                                                                                                                                                                                                                                                                                                |
| Complete List of Authors:       | Liljeroos, Maria; Linkopings universitet, Department of Medical and Health Sciences ; Centre for Clinical Research Sörmland, Uppsala University, Eskilstuna, Sweden<br>Ågren, Susanna; Linkopings universitet, Department of Medical and Health Sciences ; Universitetssjukhuset i Linköping, Department of Cardiothoracic Surgery<br>Jaarsma, Tiny; of Health Sciences Linköping University, Department of Social and Welfare Studies<br>Stromberg, Anna; Linköping University, Department of Medical and Health Sciences |
| <b>Primary Subject Heading</b>: | Nursing                                                                                                                                                                                                                                                                                                                                                                                                                                                                                                                    |
| Secondary Subject Heading:      | Communication, Medical education and training, Qualitative research                                                                                                                                                                                                                                                                                                                                                                                                                                                        |
| Keywords:                       | Heart failure < CARDIOLOGY, EDUCATION & TRAINING (see Medical Education & Training), Quality in health care < HEALTH SERVICES ADMINISTRATION & MANAGEMENT, QUALITATIVE RESEARCH                                                                                                                                                                                                                                                                                                                                            |
|                                 |                                                                                                                                                                                                                                                                                                                                                                                                                                                                                                                            |

SCHOLARONE™  
Manuscripts

Dialogues between nurses, patients with heart failure and their partners during a dyadic psychoeducational intervention – a qualitative study

Running head;

Patients with heart failure and their partners' dialogues with nurses

Registrerad in ClinicalTrials.gov NCT02398799

Maria LILJEROOS, RN, PhD<sup>1,2</sup>, Susanna ÅGREN, RN, PhD<sup>1,3</sup>, Tiny JAARSMA, RN, Professor<sup>4</sup>, Anna STRÖMBERG, RN, Professor<sup>1,5,6</sup>

<sup>1</sup>Department of Medicine and Health Sciences, Linköping University, Linköping, Sweden

<sup>2</sup>Centre for Clinical Research Sörmland, Uppsala University, Eskilstuna, Sweden

<sup>3</sup>Department of Cardiothoracic Surgery, Linköping University, Linköping, Sweden

<sup>4</sup>Department of Social and Welfare Studies, Linköping University, Linköping, Sweden

<sup>5</sup>Department of Cardiology, Linköping University, Linköping, Sweden

<sup>6</sup>Program in Nursing Science, University of California Irvine, Irvine, United States

Correspondence to author: Maria Liljeroos, Department of Medicine, Mälarsjukhuset hospital, Eskilstuna, Sweden, Tel +46 16 104873, Email: [maria.liljeroos@hotmail.com](mailto:maria.liljeroos@hotmail.com), Twitter: @MartorMaria

#### Acknowledgements

We would like to thank all participating patients, partners and heart failure nurses who participated in the study. We also thank David Strömberg for language editing.

Word count 4401 words

## Abstract

**Objectives:** To describe nurses' documentation of the content in a psycho-educational intervention inspired by Stuijbergen's model addressing cognitive, supportive and behavioural needs of patient-partner dyads affected by heart failure.

**Design:** A descriptive qualitative design were used analysing nurses' documentation in a dialogue guide based on a health-promotion model.

**Settings:** The dialogue guide was used during three nurse-led sessions at two heart failure clinics in Sweden with patients and partners with heart failure during the years 2005-2008.

**Participants:** The dialogue guides from 71 patient-partner dyads were analyzed using direct deductive content analyses. Patients mean age was 69 years and 31% were female, partners mean age was 67 years and 69% were female.

**Results.** The findings supported the conceptual health-promotion model and identified barriers, recourses and self-efficacy described by the dyads within each category.

**Conclusion:** The dyads described that during the sessions they had enhanced knowledge and greater confidence to handle their life situation and expressed that they needed psycho-educational support during the whole illness trajectory. The results may guide and help to improve content and quality when caring for patients and partners affected with heart failure and also when designing new interventions.

**Trial registration:** ClinicalTrials.gov NCT02398799

**Keywords;** nursing, nurses, heart failure, communication, dyad, family, content analysis, self-care, support, patient education

**Strengths and limitations of this study**

- A strength of this study is that the patient-nurse discussions were structured on an existing health promotion model.
- This study adds knowledge on how a health promotion model could be used when delivering a psycho-educational intervention to patients with heart failure and their partners.
- Analysis of nurses' documentation did not allow for consideration of broader contextual factors related to patient-partner cognitive, supportive and behavioural needs, and therefore future in-depth qualitative research could give further insights.

## Introduction

Heart failure (HF) is a serious condition and the leading cause for hospitalization, and re-admissions for deterioration remains high [1]. Despite most patients receiving education on how to manage the disease, many are not able to adequately engage in self-care activities [2]. HF is characterized by a number of signs and symptoms that influence both the patients' and their partners life situation. Thus, being supported by a partner is important and could improve patients' ability to perform self-care [3, 4]. Partners might need support from healthcare to be able to help the patient handle self-care in everyday life [5-8]. If the partner lack knowledge of HF or do not understand how to support the patient, giving support to the patient may be difficult. Interventions to improve HF self-care should therefore also include involvement of the patients partner and family.

However, more responsibilities laid on partners can lead to increased physical and mental distress, which in turn can cause caregiver burden [9, 10]. Previous studies have found that as much as thirty per cent of the partners perceive a moderate caregiver burden [11, 12].

Guidelines state that education is crucial for patients with HF and it is also advised to include partners in the educational programme [1]. The topics included in the nurse's educational sessions are recommended to cover various aspects of self-care and actions to take should symptoms worsen. Since patient health outcomes are related to the quality of communication with health professionals [13], teaching strategies should be tailored to each patient and reflect the patient's knowledge, motivation and cognitive function [14].

Patients and partners wish for more support from healthcare professionals to be able to handle learn their situation but to date, contemporary HF educational programmes are mainly patient-focused, but recently awareness of partners psycho-educational needs has been increasing [5]. However, there are still few HF interventions addressing both patients' and partners' educational needs. A recent review searched for effective education for HF patients and informal caregivers and found six studies with wide variation in quality [15]. The authors requested further theory-driven interventions to demonstrate what family-based HF interventions are effective for HF patients and informal caregivers.

## Background

A few studies have evaluated the effects of family-focused, educational interventions and the results give no clear guidance on how programmes should be designed to give the best effect

1  
2  
3 on patient and partner outcomes [15, 16]. One intervention improved both patients' and  
4 partners' knowledge but showed modest improvements in other outcomes [17]. Two studies  
5 found that caregiver depression or anxiety did not differ between the educational and control  
6 groups over time [18]. Caregiver burden have shown dissimilar results, one supportive  
7 intervention study found burden reduced after 3 month for partners in the intervention group  
8 [19], whereas another study found no group difference after 24 months [20]. Only one  
9 previous study was guided by an educational theory [17] using self-determination theory [21]  
10 to guide HF patients and informal caregivers on decreasing sodium intake.

11  
12 The lack of conclusive research inspired us to develop a structured dialogue guide based on a  
13 conceptual health-promotion model constructed by Stuijbergen, Becker [22] and test it during  
14 three nurse-led psycho-educational sessions at the HF outpatient clinic. The model was  
15 originally developed and tested for patients with Multiple Sclerosis, a disease with a path  
16 similar to HF, with the burden of fatigue and decreased physical ability. The model had not  
17 previously included partners or families, but as partners' provides a lot of support to patients'  
18 self-care, here the model was used for the patient-partner dyad. The model combined  
19 educational and psychosocial support and assumes that development of skills and knowledge  
20 reduces barriers and enhances resources and self-efficacy and results in better health-  
21 promoting behaviours. Self-efficacy can be defined as a person's belief in their own ability to  
22 manage to handle a particular situation [23].

23  
24 The dialogue guide was used as a base for the conversations during three sessions and  
25 included practical, educational and psychosocial topics that were addressed during the nursing  
26 sessions. The result of the interventional study is reported elsewhere [20]. In this study, we set  
27 out to analyze the nurses' documentation from the psycho-educational sessions. This was done  
28 in order to see how Stuijbergen, Becker [22] model was used during the psycho-educational  
29 intervention provided by nurses to the patient-partner dyads. We also wanted to obtain a  
30 deeper understanding of what topics the dyads found important to discuss with the nurses, and  
31 to what extent all parts of the cognitive, supportive and behavioural components of the model  
32 were covered in the dialogues between dyads and nurses.

### 33 34 35 36 37 38 39 40 41 42 43 44 45 46 47 48 49 50 51 52 53 **Aim**

54 To describe nurses' documentation of the content in a psycho-educational intervention  
55 inspired by Stuijbergen's model addressing cognitive, supportive and behavioural needs of  
56 patient-partner dyads affected by HF.  
57  
58  
59  
60

## Design

A descriptive, qualitative design was used to analyse nurses' documentation in dialogue guides used during sessions at the outpatient clinic with patients suffering from HF and their partners. The study is part of a project aiming at developing and evaluating psycho-educational support to patient-partner dyads affected by HF, ClinicalTrials.gov Identifier: NCT02398799 [20].

## Procedure

The research team started by constructing a dialogue guide whose theoretical framework was based on a conceptual health-promotion model [22, 24], Figure 1. Previous interventions using the model have a cognitive component delivering information, but the major component focused on improving the patient's self-efficacy by identifying barriers, increasing support and developing skills and beliefs in one's capacity to achieve the desired behavioural changes. In the current study, the dialogue guide included a cognitive, a supportive and a behavioural component and focused on helping patients and partners to change thoughts and behaviours and implementing strategies for self-care management. All sessions included practical, educational and psychosocial topics and the dyads were encouraged to speak about all subjects and concerns they felt they needed to discuss.

After construction, the five-page dialogue guide was used during three nursing sessions at the HF outpatient clinic. The sessions took place between years 2005 and 2008 and were scheduled 2, 6 and 12 weeks after patients were discharged from hospital after their being admitted due to worsening HF. Each session was performed as a discussion and focused on both the patients' and the partners' situation and experiences, their individual and mutual needs and expectations. All sessions included HF education to improve the dyads problem-solving skills that would help them to recognize and modify factors contributing to psychological and emotional distress, in order to maintain and strengthen their physical and mental functions and perceived control, Figure 2. During the sessions the patient and partner participated as equals and had the same opportunity to pose questions and speak about their individual concerns.

All four participating HF nurses were experienced in caring for HF patients and had attended three days of theoretical and practical training on how to deliver the intervention and document the dialogues, before the study started. On several occasions, the study team visited



the HF clinics and assessed the nurses' competence and study fidelity through observations and consultations.

Insert Figure 1. The conceptual health promotion model by Stuijbergen et al, and Figure 2. Cognitive, supportive and behavioural goals for each visit.

### Participants

The dialogue guides from 71 patients with HF and their co-habiting partners were included in the analyses, Table 1. The mean age for the patients was 69 ( $\pm 14$ ) years and partners 67 ( $\pm 12$ ) years, 69% of the patients were male and 55% were found to be in the New York Heart Association function-class III. Regarding employment, 14% of the patients and 33% of the partners worked full time, 86% of the patients and 64% of the partners had a pension/were on sick leave, 3% of the partners were homemakers.

**Table 1. Characteristics of the Participants**

|                               | Patients (n=71) | Partners (n=71) |
|-------------------------------|-----------------|-----------------|
| <b>Sociodemographics</b>      |                 |                 |
| Age, mean $\pm$ SD            | 69 ( $\pm 14$ ) | 67 ( $\pm 12$ ) |
| Female, n (%)                 | 31%             | 69%             |
| <b>NYHA class, n (%)</b>      |                 |                 |
| II                            | 24 (35)         |                 |
| III                           | 40 (55)         |                 |
| IV                            | 7 (10)          |                 |
| <b>Employment, n (%)</b>      |                 |                 |
| Full time                     | 10 (14)         | 22 (33)         |
| Disability pension/sick leave | 13 (17)         | 2 (3)           |
| Homemaker                     | 1 (1)           | 2 (3)           |
| Pension                       | 47 (68)         | 45 (61)         |

### Data collection

The data consisted of the nurses hand-written documentation in the five-page dialogue guides used during the intervention. During each of the three sessions, the nurses documented summaries of the discussions regarding the situation, given information and agreements and described difficulties.

### Data analysis

A directed content analysis was selected for the analysis [25]. Directed content analysis is by nature deductive and is used to validate or extend an existing theory or a model. The analysis is guided by a structured analytic process using existing research where the researcher begins with predetermined concepts as initial predetermined coding categories [26]. These predetermined categories are then used to code the text [25]. In the current study, we wanted to investigate to what extent Stuijbergen's model [22] had been used and could be validated in the context, using the nurses documentation.

The initial coding categories were based on the areas in the dialogue guide: 1) cognitive components 2) supportive components 3) behavioural components, which were developed from the conceptual health-promotion model [22]. The researchers started by developing operational definitions on the categories, see Table 2.

**Table 2. Coding framework based on the conceptual health promotion model**

| Coding category               | Description                                                                                                                                                                                                                                     |
|-------------------------------|-------------------------------------------------------------------------------------------------------------------------------------------------------------------------------------------------------------------------------------------------|
| <b>Cognitive component</b>    | Texts were coded into this category when statements described lifestyle modifications, medications and symptom management.                                                                                                                      |
| <b>Supportive components</b>  | Texts were coded into this category when statements assess patients or partners need of support, partner's caregiver burden, modifying caregiver behavior, strengthen self-care behaviour.                                                      |
| <b>Behavioural components</b> | Texts were coded into this category when statements described barriers to lifestyle modifications, strategies to improve or maintain self-care behaviour, intentions, abilities and self-efficacy regarding self-care, planning for the future. |

1  
2  
3 Secondly, the first author (ML) typed out the content in the dialogue guides into a clear copy  
4 and numbered the transcripts so it was possible to see from which dialogue guide they were  
5 derived. To obtain a sense of the whole, transcriptions were read through several times by all  
6 authors. In the next step the text was reviewed and text that described cognitive, supportive or  
7 behavioural components was sorted into one of the predetermined categories.  
8

9  
10 The text in the dialogue guide was validated to be part of the predetermined categories or to  
11 be findings that were new and unknown [25, 27]. Each category was then reviewed and the  
12 content was divided into what were considered to be barriers, resources or self-efficacy,  
13 which are the concepts in the model. Finally, we compared the extent to which the data were  
14 supported by Stuijbergen's model versus what represented new aspects not described in the  
15 model.  
16  
17  
18  
19  
20  
21

22  
23 The first and the last author conducted the analysis, while the other two authors were involved  
24 in the discussions. Throughout the analysis, there was continuous back and forth movement  
25 between the whole text and the categories including the concepts of the model, where all  
26 authors scrutinized and repeatedly discussed the results to ensure the trustworthiness of the  
27 data analysis.  
28  
29  
30  
31

### 32 33 **Rigour**

34 In qualitative research, the concepts of credibility, transferability, dependability and  
35 confirmability are considered aspects of trustworthiness [28].  
36

37 In this study, a directed deductive content analysis was chosen to validate an existing model  
38 [22]. Directed content analysis is a structured and systematic analysis process and the method  
39 guides the findings towards existing codes and categories [25]. By using directed content  
40 analysis, trustworthiness can be achieved, as the text is compared with an existing model,  
41 which in turn has gone through a publication process. The systematic way of working with the  
42 analysis and the use of an existing model or theory strengthens the trustworthiness [29].  
43  
44

45 To strengthen the credibility and confirmability different strategies have been used.  
46

47 The nurses' documentation in the dialogue guides has been used verbatim. The text varied in  
48 depth and length. Some nurses wrote summatively and others described the discussions in  
49 more words. Nevertheless, all dialogue guides provided important and clear information on  
50 the components of dyad functioning as assessed during the sessions. The raw data consisted of  
51 handwritten text, but all nurses had clear handwriting so all data were credible.  
52  
53  
54  
55  
56  
57

58 The results have been discussed and compared to previous research. The authors are all  
59  
60

1  
2  
3 experienced nurses and for many years have worked with patients with HF and also met their  
4 partners. During the analysis, the material has been read many times and the various  
5 components in the subcategories and the categories were reflected upon and this result can be  
6 seen as a possible interpretation of the data. An analyst triangulation was implied including  
7 both individual coding and consensus discussions in the research team allowing for testing  
8 negative cases and rival explanations.  
9

10  
11  
12 To fulfill dependability the authors maintained a decision trail developing the interview guide,  
13 during data collection, in analysis and also the research team regularly visited the nurses and  
14 assessed their competence to deliver the intervention through observations and consultations.  
15  
16 Transferability of the findings was facilitated as the sample; the context and the analysis  
17 process are described in detail. Transferability to similar HF samples is possible since there  
18 were dialogue guides available from 71 dyads, which is a fairly large sample.  
19

20  
21 To ensure confidentiality, neither the names of the participants nor hospitals are published.  
22  
23

### 24 25 26 **Ethical considerations**

27  
28 The study was approved by the Regional Ethical Review Board in Linköping, Sweden (Study  
29 code 03-568/ M178-04). The nurses at the HF clinic were informed that data would be  
30 analyzed for study purposes.  
31  
32

### 33 34 35 **Results**

36  
37 The findings from the analysis showed that the conceptual health-promotion model by  
38 Stuijbergen et al., [22] was used during the psycho-educational sessions. The analysis  
39 confirmed the three predetermined categories: 1) cognitive components 2) supportive  
40 components 3) behavioural components. The content in the three categories was divided into  
41 the concepts barriers, resources and self-efficacy.  
42  
43  
44

### 45 46 47 **Cognitive component**

#### 48 49 **Barriers**

50  
51 The major cognitive barrier for both patients and partners was the described lack of  
52 knowledge. Some patients had received information prior to the sessions but several patients  
53 had no prior knowledge about the disease. They did not know that self-care could be carried  
54 out and affect their well-being although they had lived with the diagnosis for many years.  
55  
56 Others described that they did not really understand that they were sick and the lack of insight  
57  
58  
59  
60

1  
2  
3 had meant that they had not engaged in self-care activities.  
4  
5

6 Almost none of the partners expressed that they had prior knowledge and therefore they had  
7 not been involved in the patients' self-care activities. A few partners had searched for  
8 information about HF on the Internet, but found many websites lacking practical information  
9 which became more of a cognitive barrier than a resource in daily living.  
10

11 As they discussed their expectations of the sessions, the dyads expressed a broad range of  
12 expectations varying from a wish and belief that the patient would be cured, to the other side  
13 of the coin; that it does not matter what we do because both body and heart are too old and too  
14 sick. Also a few partners did not want to know anything about HF because it made them feel  
15 worried and uneasy.  
16  
17  
18  
19  
20  
21

## 22 **Resources**

23 Cognitive resources were found when the dyads expressed a wish to learn about HF. At the  
24 first session, both patients and partners posed general questions about HF treatment, causes  
25 and prognosis after receiving a general knowledge overview by the nurse. However, with  
26 increased knowledge, both patients' and partners' questions were more specific regarding  
27 how to perform self-care activities on a daily basis.  
28  
29  
30  
31  
32  
33

## 34 **Self-efficacy**

35 During the sessions, the dyads described that they enhanced their knowledge and had a greater  
36 confidence to handle their situation. The patients felt they have had an opportunity to pose  
37 questions and now had in-depth knowledge of the disease, and due to that, the confidence to  
38 act had increased.  
39

40 Partners felt they had received guidance regarding exercise, for example how much someone  
41 who has HF can walk without it becoming harmful. So now they encouraged the patient to  
42 exercise. They also learned and felt confident in how to act in case of deterioration and how  
43 deterioration could be prevented.  
44  
45  
46  
47  
48  
49  
50

## 51 **Supportive component**

### 52 **Barrier**

53 Supportive barriers could be both emotional and practical, and both patients and partners  
54 described they often lacked support. Examples of emotional barriers were that due to anxiety  
55  
56  
57  
58  
59  
60

1  
2  
3 and consideration, some partners tried to set limits to physical activity so patients do not  
4 overstrain themselves. When patients felt overprotected this sometimes leads to tension and  
5 conflicts in the relationship. During the discussions the nurses helped and guided dyads to  
6 communicate their thoughts and concerns with each other.  
7  
8

9  
10 Another barrier was loss of friends due to the disease. Patients could no longer socialize like  
11 before and therefore the partner had less social support, activities and interactions. The dyads  
12 became isolated since the partner did not want to leave patient alone and do things on their  
13 own.  
14  
15

16 Dyads described a lack of good healthcare contacts. Nurses' documentation revealed that  
17 many patients were sad and depressed over their situation. Partners described a worry and  
18 asked for long-term guidance from healthcare professionals to learn how to offer support.  
19 Since several partners had no previous knowledge about the disease, the sessions brought up  
20 many thoughts that they needed a nurse's support to process.  
21  
22

23  
24 The dyads expressed a wish for further, regular visits at the HF outpatient clinic. The visits  
25 had created security for both patient and partner and they expressed anxiety when the possibly  
26 to contact the nurses would end. The visits had made them feel secure and they knew they had  
27 someone they could contact when questions arose.  
28  
29  
30  
31

32  
33 A practical, supportive barrier was if the partner also had some illness and therefore was not  
34 able to provide support to the patient with HF, and maybe instead needed help and support  
35 themselves. Need of formal support from someone outside the family arose primarily if both  
36 patient and partner had difficulty carrying out practical tasks, such as driving or managing the  
37 household.  
38  
39

40  
41 Some dyads experienced hopelessness when the future was discussed and patients were  
42 perceived as depressed in the nurses' documentation. Some patients expressed a need for  
43 contact with a social worker; others were in continuous need of support from home-care.  
44  
45  
46

#### 47 48 **Resources**

49 Many dyads said that they helped each other and shared the chores on the basis of strength  
50 and ability. With increased knowledge, they seemed to understand better why it is important  
51 to perform self-care activities, and for some patients this led to a need of support from the  
52 partner. Partners wished to learn and become more involved in the care and help with  
53 decision-making on a daily basis.  
54  
55

56  
57 The need for support increased when patients were depressed or suffered from multi-  
58  
59  
60

1  
2  
3 morbidity. Some patients had previously had contact with a social worker and have, due to  
4 these visits, been helped to accept their situation.  
5  
6

### 7 8 **Self-efficacy**

9  
10 The documentation described that many partners give plenty of practical support, but also  
11 how they encouraged patients to take own responsibility. Also, when the partner had  
12 knowledge and the patient was motivated, confidence in their own abilities increased in both  
13 patients and partners.  
14  
15

## 16 17 18 **Behavioural component**

### 19 20 **Barrier**

21 A behavioural barrier was patients' lack of strength, which led to involuntary inactivity. Both  
22 patients and partners felt that partners had to take on more of the workload in the household.  
23 The additional burden was described as mentally exhausting for the partners due to a greater  
24 responsibility.  
25  
26

27  
28 Some dyads described that the new roles led to conflicts and fractions in the relationship.  
29 Partners thought it was difficult to leave the patient alone and that they had to hurry home  
30 from work, leaving no time for own activities.  
31  
32

33 Some patients found it hard to follow dietary advice, to weigh themselves daily and to  
34 monitor and assess HF signs and symptoms. For some dyads, HF had been a barrier for  
35 sexuality, where the patient no longer has the energy and the partner no longer dares to have a  
36 sexual relation. The documentation did not reveal how the nurse discussed the perceived  
37 sexual difficulties with the dyads.  
38  
39  
40  
41  
42

### 43 44 **Resources**

45 Most patients wished to take the main responsibility to manage their self-care, but sometimes  
46 were lacking confidence in their own ability and doubting the effect of self-care advices.  
47

48 When seeing effects of their self-care activities, the patients' confidence to manage self-care  
49 increased.  
50  
51

52  
53 For some dyads, the new roles had strengthened the relationship. They collaborated to follow  
54 instructions about behavioural changes and provided mutual support to each other. In some  
55 relationships, the partner functioned as a resource for the patient, someone to discuss  
56  
57  
58  
59  
60

1  
2  
3 strategies with. Other partners provided help with self-care on a daily basis.  
4  
5

### 6 **Self-efficacy**

7  
8 During the last visit, the nurses assessed that most of the dyads had a good understanding  
9 about HF. They had confidence when following the self-care advice given during the sessions  
10 and had gradually adapted to the situation. Adaptations could, for example, be a change of  
11 accommodation or partner's employment.  
12  
13

### 14 **Discussion**

15  
16 Our study showed that the model developed by Stuijbergen et al., [22], covering cognitive,  
17 supportive and behavioural components of dyad functioning, was fully addressed during the  
18 nursing sessions. The findings revealed a wide range of cognitive, supportive and behavioural  
19 needs among the dyads. The model highlights the importance of identifying and discussing  
20 barriers, resources and self-efficacy to increase the dyads health- promoting behaviours.  
21  
22

23 For some dyads the new roles had strengthened their relationship and patients and partners  
24 collaborated and provided mutual support to each other. It is known that supporting a person  
25 with HF involves several salient changes in daily life and includes both benefits and burdens.  
26 It represents an opportunity for increased intimacy with the person who is ill. Care-giving is  
27 sometimes experienced as rewarding and provides satisfaction and hopes for a positive future  
28 [30, 31].  
29

30 The nurses' documentation showed that most patients found great support in their partners  
31 and partners provided both practical and emotional support. Caregiver support is known to  
32 improve self-care and strengthen patients adherence to medical treatment and maintaining a  
33 healthy lifestyle [3, 32, 33]. However, one recent study found the contrary. Cocchieri and  
34 colleagues [34] found that having a caregiver was associated with poor self-care maintenance.  
35 They concluded that their result might be due to the fact that patients having a partner were  
36 more cognitive and functionally impaired, had higher co-morbidity and were in need of more  
37 care.  
38  
39

40  
41 Caregiving may sometimes be experienced as burdensome for the partner. Partners in the  
42 current study described they have taken over much of the workload in the household and  
43 helped the patients with practical tasks regarding the patient's self-care management, and for  
44  
45  
46  
47  
48  
49  
50  
51  
52



1  
2  
3 some it meant a burden. One third of partners to patients with HF were perceived moderate  
4 caregiver burden and could be at higher risk of decreased health [11]. As in previous research,  
5 partners sacrificed their own needs in order to support care for the patient. Partners perceived  
6 a need for support with daily living as well as easy access to the healthcare providers [35]. To  
7 reduce caregiver burden interventions should focus on improving social support and provide  
8 knowledge of HF to both patients and caregivers to increase their perceived control over the  
9 situation [30].  
10  
11  
12  
13  
14

15  
16 With the increasing awareness of patient needs, there are a lot of educational moments in  
17 most current HF care. However, it still seems important to consider cognitive aspects during  
18 nursing sessions. Patients felt that they had never received information about their illness  
19 before. One reason could be that they had suffered from HF for many years and only received  
20 education at the time of the diagnosis, and now the information has been forgotten. Another  
21 reason could be that there is a high occurrence of mild cognitive deficits among patients with  
22 HF without known cognitive diseases or disorders [36]. This calls for repeated information  
23 and follow-ups and close attention should be paid to the patient's self-care abilities and  
24 compliance, as inadequate self-care activities could lead to repeated hospitalizations.  
25 Cognitive impairment presents a barrier to the complex medication and self-care management  
26 that is required in HF treatment [37]. Due to this, both patients and caregivers perceive a need  
27 to have a long-term healthcare contact they can turn to when questions arise [35, 38]. This is  
28 supported in the present results where the dyads expressed a need for long-term support from  
29 nurses, and for some, also homecare and social workers.  
30  
31  
32  
33  
34  
35  
36  
37  
38  
39  
40

41 The behavioural component includes self-care abilities, and a prerequisite for self-care  
42 adherence is to gain knowledge. Self-care has been defined as a naturalistic decision-making  
43 process which influences actions that maintain physiologic stability, facilitates the perception  
44 of symptoms and directs the management of symptoms [39]. Patients and partners need to  
45 learn about HF to become active participants in the management of the illness but sometimes  
46 their own knowledge was not enough and then the dyads wanted easy access to healthcare.  
47 Long-term support was highlighted as an important factor to remain being perceived as  
48 healthy and well-being. Previous research has also addressed both patients and caregivers  
49 need for a regular healthcare contact they can easily contact, as they currently experience  
50 difficulties both navigating and assessing support [40]. Today, a lot of different healthcare  
51 professionals (primary care physicians and nurses, cardiologists and HF nurses) could be  
52  
53  
54  
55  
56  
57  
58  
59  
60

1  
2  
3 involved in the care for HF patients. Patients and caregivers have to decide whom to contact  
4 based on their previous experiences, which is perceived as confusing and leads to insecurity.  
5 To instead have a permanent healthcare contact they can turn to if necessary would facilitate  
6 daily life.  
7  
8  
9

## 10 **Limitations**

11 In qualitative research, generalizability of the findings may be restricted to a particular setting  
12 or context. However, the current study findings are consistent with previous research using  
13 the Stuijbergen, Becker [22] model in a different setting and for patients with Multiple  
14 Sclerosis.  
15

16 The nurses were informed beforehand that their documentation was going to be analysed. The  
17 nurses' documentation in the dialogue guides was transcribed verbatim. The text varied in  
18 depth and length. Some nurses wrote summatively and others described the discussions in  
19 more words. Nevertheless, all dialogue guides provided important and clear information on  
20 the components of dyad functioning as assessed during the sessions.  
21

22 The raw data consisted of handwritten text which may affect credibility. However, all nurses  
23 had clear handwriting so all data were considered accurate.  
24  
25  
26

## 27 **Conclusion**

28 This study described how cognitive, supportive and behavioural components of dyad  
29 functioning were addressed during nursing sessions with dyads affected by HF.  
30

31 We found the model to be suitable for helping patient-partner dyads with HF gain knowledge  
32 and develop skills to handle living with HF, and the model promoted healthy and supportive  
33 behaviours.  
34

35 The findings of the current study may be used to improve content and quality in HF care and  
36 can also serve as a guide when designing new psychoeducational dyad interventions. The  
37 findings provide practical examples of cognitive, supportive and behavioural needs, which  
38 need to be considered when meeting patients and partners affected by HF. This knowledge  
39 can be applied in HF units to develop a dyad educational regime.  
40  
41  
42  
43  
44  
45  
46  
47  
48  
49  
50  
51  
52  
53  
54  
55  
56  
57  
58  
59  
60

## References

1. Ponikowski, P., et al., *2016 ESC Guidelines for the diagnosis and treatment of acute and chronic heart failure: The Task Force for the diagnosis and treatment of acute and chronic heart failure of the European Society of Cardiology (ESC). Developed with the special contribution of the Heart Failure Association (HFA) of the ESC*. Eur J Heart Fail, 2016.
2. Riegel, B., et al., *State of the science: promoting self-care in persons with heart failure: a scientific statement from the American Heart Association*. Circulation, 2009. **120**(12): p. 1141-63.
3. Buck, H.G., et al., *Caregivers' contributions to heart failure self-care: A systematic review*. Eur J Cardiovasc Nurs, 2014.
4. Clark, A.M., et al., *Determinants of effective heart failure self-care: a systematic review of patients' and caregivers' perceptions*. Heart, 2014. **100**(9): p. 716-21.
5. Molloy, G.J., D.W. Johnston, and M.D. Witham, *Family caregiving and congestive heart failure. Review and analysis*. Eur J Heart Fail, 2005. **7**(4): p. 592-603.
6. Dinesen, B., et al., *Under surveillance, yet looked after: telehomecare as viewed by patients and their spouse/partners*. Eur J Cardiovasc Nurs, 2008. **7**(3): p. 239-46.
7. Lamura, G., et al., *Family carers' experiences using support services in Europe: empirical evidence from the EUROFAMCARE study*. Gerontologist, 2008. **48**(6): p. 752-71.
8. Daugherty, J., et al., *Can we talk? Developing a social support nursing intervention for couples*. Clin Nurse Spec, 2002. **16**(4): p. 211-8.
9. Ohman, M. and S. Soderberg, *The experiences of close relatives living with a person with serious chronic illness*. Qual Health Res, 2004. **14**(3): p. 396-410.
10. Rees, J., C. O'Boyle, and R. MacDonagh, *Quality of life: impact of chronic illness on the partner*. J R Soc Med, 2001. **94**(11): p. 563-6.
11. Agren, S., L. Evangelista, and A. Stromberg, *Do partners of patients with chronic heart failure experience caregiver burden?* Eur J Cardiovasc Nurs, 2010. **9**(4): p. 254-62.
12. Luttkik, M.L., et al., *Caregiver burden in partners of Heart Failure patients; limited influence of disease severity*. Eur J Heart Fail, 2007. **9**(6-7): p. 695-701.
13. Dunbar, S.B., et al., *Family education and support interventions in heart failure: a pilot study*. Nurs Res, 2005. **54**(3): p. 158-66.
14. Stromberg, A., *The crucial role of patient education in heart failure*. Eur J Heart Fail, 2005. **7**(3): p. 363-9.
15. Srisuk, N., et al., *Heart failure family-based education: a systematic review*. Patient Educ Couns, 2016. **99**(3): p. 326-38.
16. Evangelista, L.S., A. Stromberg, and J.N. Dionne-Odom, *An integrated review of interventions to improve psychological outcomes in caregivers of patients with heart failure*. Curr Opin Support Palliat Care, 2016. **10**(1): p. 24-31.
17. Dunbar, S.B., et al., *A trial of family partnership and education interventions in heart failure*. J Card Fail, 2013. **19**(12): p. 829-41.
18. Lofvenmark, C., et al., *Evaluation of an educational programme for family members of patients living with heart failure: a randomised controlled trial*. J Clin Nurs, 2013. **22**(1-2): p. 115-26.
19. Etemadifar, S., et al., *The effectiveness of a supportive educative group intervention on family caregiver burden of patients with heart failure*. Iran J Nurs Midwifery Res, 2014. **19**(3): p. 217-23.

- 1
  - 2
  - 3
  - 4
  - 5
  - 6
  - 7
  - 8
  - 9
  - 10
  - 11
  - 12
  - 13
  - 14
  - 15
  - 16
  - 17
  - 18
  - 19
  - 20
  - 21
  - 22
  - 23
  - 24
  - 25
  - 26
  - 27
  - 28
  - 29
  - 30
  - 31
  - 32
  - 33
  - 34
  - 35
  - 36
  - 37
  - 38
  - 39
  - 40
  - 41
  - 42
  - 43
  - 44
  - 45
  - 46
  - 47
  - 48
  - 49
  - 50
  - 51
  - 52
  - 53
  - 54
  - 55
  - 56
  - 57
  - 58
  - 59
  - 60
20. Liljeroos, M., et al., *Long Term Follow-Up after a Randomized Integrated Educational and Psychosocial Intervention in Patient-Partner Dyads Affected by Heart Failure*. PLoS One, 2015. **10**(9): p. e0138058.
21. Ryan, R.M. and E.L. Deci, *Self-determination theory and the facilitation of intrinsic motivation, social development, and well-being*. Am Psychol, 2000. **55**(1): p. 68-78.
22. Stuifbergen, A., et al., *Promoting wellness for women with multiple sclerosis*. J Neurosci Nurs, 1999. **31**(2): p. 73-9.
23. Bandura, A., *Self-efficacy: toward a unifying theory of behavioral change*. Psychol Rev, 1977. **84**(2): p. 191-215.
24. Stuifbergen, A.K., et al., *A randomized clinical trial of a wellness intervention for women with multiple sclerosis*. Arch Phys Med Rehabil, 2003. **84**(4): p. 467-76.
25. Hsieh, H.F. and S.E. Shannon, *Three approaches to qualitative content analysis*. Qual Health Res, 2005. **15**(9): p. 1277-88.
26. Potter, W.J. and D. Levine-Donnerstein, *Rethinking validity and reliability in content analysis*. Journal of Applied Communication Research, 1999. **27**(3): p. 258-284.
27. Elo, S. and H. Kyngas, *The qualitative content analysis process*. J Adv Nurs, 2008. **62**(1): p. 107-15.
28. Patton, M.Q., *Qualitative research & evaluation methods*. 2002, London: SAGE.
29. Lincoln, Y. and E. Guba, *Naturalistic inquiry*. 1985, Newbury Park, London: Sage Publications Inc.
30. Stromberg, A., *The situation of caregivers in heart failure and their role in improving patient outcomes*. Curr Heart Fail Rep, 2013. **10**(3): p. 270-5.
31. Duggleby, W., et al., *Metasynthesis of the hope experience of family caregivers of persons with chronic illness*. Qual Health Res, 2010. **20**(2): p. 148-58.
32. Gallagher, R., M.L. Luttik, and T. Jaarsma, *Social support and self-care in heart failure*. J Cardiovasc Nurs, 2011. **26**(6): p. 439-45.
33. Pressler, S.J., et al., *Family caregivers of patients with heart failure: a longitudinal study*. J Cardiovasc Nurs, 2013. **28**(5): p. 417-28.
34. Cocchieri, A., et al., *Describing self-care in Italian adults with heart failure and identifying determinants of poor self-care*. Eur J Cardiovasc Nurs, 2015. **14**(2): p. 126-36.
35. Doherty, L.C., D. Fitzsimons, and S.J. McIlpatrick, *Carers' needs in advanced heart failure: A systematic narrative review*. Eur J Cardiovasc Nurs, 2015.
36. Nordlund, A., et al., *Frequent mild cognitive deficits in several functional domains in elderly patients with heart failure without known cognitive disorders*. J Card Fail, 2015.
37. Cannon, J.A., J.J. McMurray, and T.J. Quinn, *'Hearts and minds': association, causation and implication of cognitive impairment in heart failure*. Alzheimers Res Ther, 2015. **7**(1): p. 22.
38. Liljeroos, M., et al., *Perceived caring needs in patient-partner dyads affected by heart failure: A qualitative study*. J Clin Nurs, 2014.
39. Riegel, B., V.V. Dickson, and K.M. Faulkner, *The Situation-Specific Theory of Heart Failure Self-Care: Revised and Updated*. J Cardiovasc Nurs, 2015.
40. Browne, S., et al., *Patient, carer and professional perspectives on barriers and facilitators to quality care in advanced heart failure*. PLoS One, 2014. **9**(3): p. e93288.

1  
2  
3  
4  
5  
6  
7  
8 CONTRIBUTOR SHIP STATEMENT

9 SÅ and ML collected the data. ML analysed the data and wrote the manuscript. SÅ, TJ and  
10 AS contributed to data analysis and to the writing of the manuscript. AS and TJ  
11 conceptualised and developed the idea for the study as part of the broader research  
12 programme, contributed to data analysis and to the writing of the manuscript. All authors  
13 critically edited the manuscript and read and approved the final version.  
14  
15  
16  
17

18  
19 Funding

20 This research received no specific grant from any funding agency in the public, commercial or  
21 not-for-profit sectors.  
22  
23  
24

25  
26 Competing interests

27 None declared.  
28  
29

30  
31 Ethics approval

32 The study was approved by the Regional Ethical Review Board in Linköping, Sweden (Study  
33 code 03-568/ M178-04).  
34  
35  
36

37  
38 Data sharing statement

39 No additional data are available.  
40  
41  
42  
43  
44  
45  
46  
47  
48  
49  
50  
51  
52  
53  
54  
55  
56  
57  
58  
59  
60

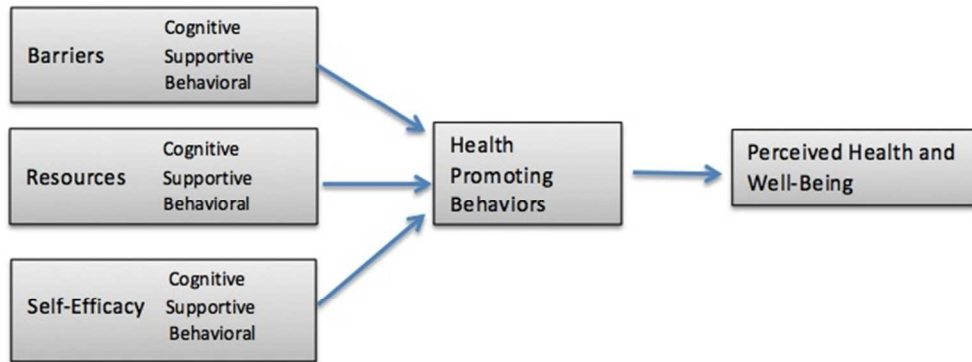

Figure 1. The conceptual health promotion model by Stuijbergen et al.

244x97mm (72 x 72 DPI)

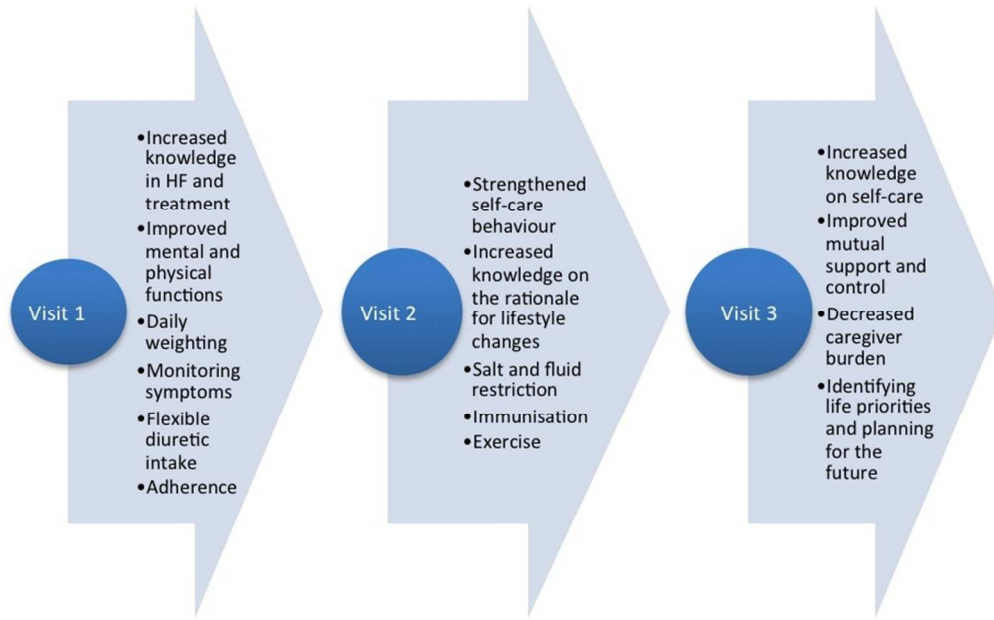

Figure 2. Cognitive, supportive and behavioural goals for each visit.

322x197mm (72 x 72 DPI)

Review only

**Revised Standards for Quality Improvement Reporting Excellence (SQUIRE 2.0)  
September 15, 2015**

| Text Section and Item Name                                   | Section or Item Description                                                                                                                                                                                                                                                                                                                                                                                                                                                                                                                                                                                                                                                                                                                                                                                                                                                                                                                                                                             |                                                                                                                                                                                                                                                                |
|--------------------------------------------------------------|---------------------------------------------------------------------------------------------------------------------------------------------------------------------------------------------------------------------------------------------------------------------------------------------------------------------------------------------------------------------------------------------------------------------------------------------------------------------------------------------------------------------------------------------------------------------------------------------------------------------------------------------------------------------------------------------------------------------------------------------------------------------------------------------------------------------------------------------------------------------------------------------------------------------------------------------------------------------------------------------------------|----------------------------------------------------------------------------------------------------------------------------------------------------------------------------------------------------------------------------------------------------------------|
| <p style="text-align: center;"><b>Notes to authors</b></p>   | <ul style="list-style-type: none"> <li>• The SQUIRE guidelines provide a framework for reporting new knowledge about how to improve healthcare</li> <li>• The SQUIRE guidelines are intended for reports that describe system level work to improve the quality, safety, and value of healthcare, and used methods to establish that observed outcomes were due to the intervention(s).</li> <li>• A range of approaches exists for improving healthcare. SQUIRE may be adapted for reporting any of these.</li> <li>• Authors should consider every SQUIRE item, but it may be inappropriate or unnecessary to include every SQUIRE element in a particular manuscript.</li> <li>• The SQUIRE Glossary contains definitions of many of the key words in SQUIRE.</li> <li>• The Explanation and Elaboration document provides specific examples of well-written SQUIRE items, and an in-depth explanation of each item.</li> <li>• Please cite SQUIRE when it is used to write a manuscript.</li> </ul> | <p style="text-align: center; color: purple;"><b>As you review the manuscript, place a checkmark in this column for each SQUIRE item that is appropriately addressed in the manuscript. Remember that not every item is necessary in every manuscript.</b></p> |
| <p style="text-align: center;"><b>Title and Abstract</b></p> |                                                                                                                                                                                                                                                                                                                                                                                                                                                                                                                                                                                                                                                                                                                                                                                                                                                                                                                                                                                                         |                                                                                                                                                                                                                                                                |
| <p style="text-align: center;"><b>1. Title</b></p>           | <p>Indicate that the manuscript concerns an initiative to improve healthcare (broadly defined to include the quality, safety, effectiveness, patient-centeredness, timeliness, cost, efficiency, and equity of healthcare)</p>                                                                                                                                                                                                                                                                                                                                                                                                                                                                                                                                                                                                                                                                                                                                                                          | <p style="text-align: center;">Title page 1</p>                                                                                                                                                                                                                |
| <p style="text-align: center;"><b>2. Abstract</b></p>        | <ol style="list-style-type: none"> <li>a. Provide adequate information to aid in searching and indexing</li> <li>b. Summarize all key information from various sections of the text using the abstract format of the intended publication or a structured summary such as: background, local problem, methods, interventions, results, conclusions</li> </ol>                                                                                                                                                                                                                                                                                                                                                                                                                                                                                                                                                                                                                                           | <p style="text-align: center;">page 2</p>                                                                                                                                                                                                                      |



|                                        |                                                                                                                                                                                                                                                                                                                                                                                                                  |                          |
|----------------------------------------|------------------------------------------------------------------------------------------------------------------------------------------------------------------------------------------------------------------------------------------------------------------------------------------------------------------------------------------------------------------------------------------------------------------|--------------------------|
| <b>Introduction</b>                    | <i>Why did you start?</i>                                                                                                                                                                                                                                                                                                                                                                                        |                          |
| <b>3. Problem Description</b>          | Nature and significance of the local problem                                                                                                                                                                                                                                                                                                                                                                     | 4                        |
| <b>4. Available knowledge</b>          | Summary of what is currently known about the problem, including relevant previous studies                                                                                                                                                                                                                                                                                                                        | 4-5                      |
| <b>5. Rationale</b>                    | Informal or formal frameworks, models, concepts, and/or theories used to explain the problem, any reasons or assumptions that were used to develop the intervention(s), and reasons why the intervention(s) was expected to work                                                                                                                                                                                 | 4-5                      |
| <b>6. Specific aims</b>                | Purpose of the project and of this report                                                                                                                                                                                                                                                                                                                                                                        | 5                        |
| <b>Methods</b>                         | <i>What did you do?</i>                                                                                                                                                                                                                                                                                                                                                                                          |                          |
| <b>7. Context</b>                      | Contextual elements considered important at the outset of introducing the intervention(s)                                                                                                                                                                                                                                                                                                                        | 6                        |
| <b>8. Intervention(s)</b>              | a. Description of the intervention(s) in sufficient detail that others could reproduce it<br>b. Specifics of the team involved in the work                                                                                                                                                                                                                                                                       | procedure, page 6        |
| <b>9. Study of the Intervention(s)</b> | a. Approach chosen for assessing the impact of the intervention(s)<br>b. Approach used to establish whether the observed outcomes were due to the intervention(s)                                                                                                                                                                                                                                                | Design p 6<br>Rigour p 9 |
| <b>10. Measures</b>                    | a. Measures chosen for studying processes and outcomes of the intervention(s), including rationale for choosing them, their operational definitions, and their validity and reliability<br>b. Description of the approach to the ongoing assessment of contextual elements that contributed to the success, failure, efficiency, and cost<br>c. Methods employed for assessing completeness and accuracy of data | Method p 6-10            |
| <b>11. Analysis</b>                    | a. Qualitative and quantitative methods used to draw inferences from the data<br>b. Methods for understanding variation within the data, including the effects of time as a variable                                                                                                                                                                                                                             | 8                        |
| <b>12. Ethical Considerations</b>      | Ethical aspects of implementing and studying the intervention(s) and how they were addressed, including, but not limited to, formal ethics review and potential conflict(s) of interest                                                                                                                                                                                                                          | 10                       |

| Results                   | <i>What did you find?</i>                                                                                                                                                                                                                                                                                                                                                                                                                                                                                                                                                                                                                                          |       |
|---------------------------|--------------------------------------------------------------------------------------------------------------------------------------------------------------------------------------------------------------------------------------------------------------------------------------------------------------------------------------------------------------------------------------------------------------------------------------------------------------------------------------------------------------------------------------------------------------------------------------------------------------------------------------------------------------------|-------|
| <b>13. Results</b>        | <ul style="list-style-type: none"> <li>a. Initial steps of the intervention(s) and their evolution over time (<i>e.g.</i>, time-line diagram, flow chart, or table), including modifications made to the intervention during the project</li> <li>b. Details of the process measures and outcome</li> <li>c. Contextual elements that interacted with the intervention(s)</li> <li>d. Observed associations between outcomes, interventions, and relevant contextual elements</li> <li>e. Unintended consequences such as unexpected benefits, problems, failures, or costs associated with the intervention(s).</li> <li>f. Details about missing data</li> </ul> | 10-14 |
| Discussion                | <i>What does it mean?</i>                                                                                                                                                                                                                                                                                                                                                                                                                                                                                                                                                                                                                                          |       |
| <b>14. Summary</b>        | <ul style="list-style-type: none"> <li>a. Key findings, including relevance to the rationale and specific aims</li> <li>b. Particular strengths of the project</li> </ul>                                                                                                                                                                                                                                                                                                                                                                                                                                                                                          | 14-15 |
| <b>15. Interpretation</b> | <ul style="list-style-type: none"> <li>a. Nature of the association between the intervention(s) and the outcomes</li> <li>b. Comparison of results with findings from other publications</li> <li>c. Impact of the project on people and systems</li> <li>d. Reasons for any differences between observed and anticipated outcomes, including the influence of context</li> <li>e. Costs and strategic trade-offs, including opportunity costs</li> </ul>                                                                                                                                                                                                          | 14-15 |
| <b>16. Limitations</b>    | <ul style="list-style-type: none"> <li>a. Limits to the generalizability of the work</li> <li>b. Factors that might have limited internal validity such as confounding, bias, or imprecision in the design, methods, measurement, or analysis</li> <li>c. Efforts made to minimize and adjust for limitations</li> </ul>                                                                                                                                                                                                                                                                                                                                           | 16    |
| <b>17. Conclusions</b>    | <ul style="list-style-type: none"> <li>a. Usefulness of the work</li> <li>b. Sustainability</li> <li>c. Potential for spread to other contexts</li> <li>d. Implications for practice and for further study in the field</li> <li>e. Suggested next steps</li> </ul>                                                                                                                                                                                                                                                                                                                                                                                                | 16    |
| Other information         |                                                                                                                                                                                                                                                                                                                                                                                                                                                                                                                                                                                                                                                                    |       |
| <b>18. Funding</b>        | Sources of funding that supported this work. Role, if any, of the funding organization in the design, implementation, interpretation, and reporting                                                                                                                                                                                                                                                                                                                                                                                                                                                                                                                | 19    |

# BMJ Open

## Dialogues between nurses, patients with heart failure and their partners during a dyadic psychoeducational intervention – a qualitative study

|                                 |                                                                                                                                                                                                                                                                                                                                                                                                                                                                                                                            |
|---------------------------------|----------------------------------------------------------------------------------------------------------------------------------------------------------------------------------------------------------------------------------------------------------------------------------------------------------------------------------------------------------------------------------------------------------------------------------------------------------------------------------------------------------------------------|
| Journal:                        | <i>BMJ Open</i>                                                                                                                                                                                                                                                                                                                                                                                                                                                                                                            |
| Manuscript ID                   | bmjopen-2017-018236.R1                                                                                                                                                                                                                                                                                                                                                                                                                                                                                                     |
| Article Type:                   | Research                                                                                                                                                                                                                                                                                                                                                                                                                                                                                                                   |
| Date Submitted by the Author:   | 08-Aug-2017                                                                                                                                                                                                                                                                                                                                                                                                                                                                                                                |
| Complete List of Authors:       | Liljeroos, Maria; Linkopings universitet, Department of Medical and Health Sciences ; Centre for Clinical Research Sörmland, Uppsala University, Eskilstuna, Sweden<br>Ågren, Susanna; Linkopings universitet, Department of Medical and Health Sciences ; Universitetssjukhuset i Linköping, Department of Cardiothoracic Surgery<br>Jaarsma, Tiny; of Health Sciences Linköping University, Department of Social and Welfare Studies<br>Stromberg, Anna; Linköping University, Department of Medical and Health Sciences |
| <b>Primary Subject Heading</b>: | Nursing                                                                                                                                                                                                                                                                                                                                                                                                                                                                                                                    |
| Secondary Subject Heading:      | Communication, Medical education and training, Qualitative research                                                                                                                                                                                                                                                                                                                                                                                                                                                        |
| Keywords:                       | Heart failure < CARDIOLOGY, EDUCATION & TRAINING (see Medical Education & Training), Quality in health care < HEALTH SERVICES ADMINISTRATION & MANAGEMENT, QUALITATIVE RESEARCH                                                                                                                                                                                                                                                                                                                                            |
|                                 |                                                                                                                                                                                                                                                                                                                                                                                                                                                                                                                            |

SCHOLARONE™  
Manuscripts

Dialogues between nurses, patients with heart failure and their partners during a dyadic psychoeducational intervention – a qualitative study

Running head:

Patients with heart failure and their partners' dialogues with nurses

Registered in ClinicalTrials.gov NCT02398799

Maria LILJEROOS, RN, PhD<sup>1,2</sup>, Susanna ÅGREN, RN, PhD<sup>1,3</sup>, Tiny JAARSMA, RN, Professor<sup>4</sup>, Anna STRÖMBERG, RN, Professor<sup>1,5,6</sup>

<sup>1</sup>Department of Medicine and Health Sciences, Linköping University, Linköping, Sweden

<sup>2</sup>Centre for Clinical Research Sörmland, Uppsala University, Eskilstuna, Sweden

<sup>3</sup>Department of Cardiothoracic Surgery, Linköping University, Linköping, Sweden

<sup>4</sup>Department of Social and Welfare Studies, Linköping University, Linköping, Sweden

<sup>5</sup>Department of Cardiology, Linköping University, Linköping, Sweden

<sup>6</sup>Sue and Bill Gross School of Nursing, University of California Irvine, Irvine, United States

Correspondence to author: Maria Liljeroos, Department of Medicine, Mälarsjukhuset Hospital, Eskilstuna, Sweden, Tel +46 16 104873, Email: [maria.liljeroos@hotmail.com](mailto:maria.liljeroos@hotmail.com), Twitter; @MartorMaria

#### Acknowledgements

We would like to thank all participating patients, partners and heart failure nurses who participated in the study. We also thank David Strömberg for language editing.

Word count 4401 words

## Abstract

**Objectives:** To describe nurses' documentation of the content in a psychoeducational intervention inspired by Stuijbergen's model addressing cognitive, supportive and behavioural needs of patient-partner dyads affected by heart failure.

**Design:** A descriptive qualitative design was used analysing nurses' documentation in a dialogue guide based on a health-promotion model.

**Settings:** The dialogue guide was used during three nurse-led sessions at two heart failure clinics in Sweden with patients affected with heart failure and their partners-during the years 2005-2008.

**Participants:** The dialogue guides from 71 patient-partner dyads were analysed using direct deductive content analyses. Patients' mean age was 69 years and 31% were female, partners' mean age was 67 years and 69% were female.

**Results.** The findings supported the conceptual health-promotion model and identified barriers, recourses and self-efficacy described by the dyads within each category.

**Conclusion:** The dyads described that during the sessions they had gained enhanced knowledge and greater confidence to handle their life situation and expressed that they needed psycho-educational support during the whole illness trajectory. The results may guide and help to improve content and quality when caring for patients affected with heart failure and their partners and also when designing new interventions.

**Trial registration:** ClinicalTrials.gov NCT02398799

**Keywords;** nursing, nurses, heart failure, communication, dyad, family, content analysis, self-care, support, patient education

**Strengths and limitations of this study**

- A strength of this study is that the patient-nurse discussions were structured on an existing health promotion model.
- This study adds knowledge on how a health promotion model could be used when delivering a psycho-educational intervention to patients with heart failure and their partners.
- Analysis of nurses' documentation did not allow for consideration of broader contextual factors related to patient-partner cognitive, supportive and behavioural needs, and therefore future in-depth qualitative research could give further insights.

## Introduction

Heart failure (HF) is a serious condition and the leading cause for hospitalization, and re-admissions for deterioration remain high [1]. Despite most patients receiving education on how to manage the disease, many are not able to adequately engage in self-care activities [2]. HF is characterized by a number of signs and symptoms that influence both the patients' and their partners' life situation. Thus, being supported by a partner is important and could improve patients' ability to perform self-care [3, 4]. Partners might need support from healthcare to be able to help the patient handle self-care in everyday life [5-8]. If the partner lacks knowledge of HF or does not understand how to support the patient, then giving support to the patient may be difficult. Interventions to improve HF self-care should therefore also include involvement of the patient's partner and family.

However, more responsibilities laid on partners can lead to increased physical and mental distress, which in turn can cause caregiver burden [9, 10]. Previous studies have found that as much as thirty per cent of the partners perceive a moderate caregiver burden [11, 12].

Guidelines state that education is crucial for patients with HF and it is also advised to include partners in the educational programme [1]. The topics included in the nurse's educational sessions are recommended to cover various aspects of self-care and actions to take should symptoms worsen. Since patient health outcomes are related to the quality of communication with health professionals [13], teaching strategies should be tailored to suit each patient and reflect the patient's knowledge, motivation and cognitive function [14].

Patients and partners wish for more support from healthcare professionals to be able to handle their situation. To date, contemporary HF educational programmes are mainly patient-focused, but recently awareness of partners' psycho-educational needs has been increasing [5]. However, there are still few HF interventions addressing both patients' and partners' educational needs. A recent review searched for effective education for HF patients and informal caregivers and found six studies with wide variation in quality [15]. The authors requested further theory-driven interventions to demonstrate which family-based HF interventions are effective for HF patients and informal caregivers.

## Background

1  
2  
3 A few studies have evaluated the effects of family-focused, educational interventions and the  
4 results give no clear guidance on how programmes should be designed to give the best effect  
5 on patient and partner outcomes [15, 16]. One intervention improved both patients' and  
6 partners' knowledge but showed modest improvements in other outcomes [17]. Two studies  
7 found that caregiver depression or anxiety did not differ between the educational and control  
8 groups over time [18]. Caregiver burden has shown dissimilar results, one supportive  
9 intervention study found burden reduced after 3 months for partners in the intervention group  
10 [19], whereas another study found no group difference after 24 months [20]. Only one  
11 previous study was guided by an educational theory, [17] using self-determination theory [21]  
12 to guide HF patients and informal caregivers on decreasing sodium intake.

13  
14 The lack of conclusive research inspired us to develop a structured dialogue guide based on a  
15 conceptual health-promotion model constructed by Stuifbergen et al., [22] delivered during  
16 three nurse-led psycho-educational sessions at the HF outpatient clinic. When the study was  
17 designed there were no previous theory-based studies in the HF population; the model used  
18 was originally developed and tested for patients with Multiple Sclerosis (MS). Multiple  
19 Sclerosis is a disease with a path similar to HF, with the burden of fatigue and decreased  
20 physical ability. The model focuses on promoting health and not solely helping individuals to  
21 manage a disease, and propose that health promoting behaviours are influenced by a person's  
22 perceived barriers, resources and self-efficacy for health behaviours. The concepts in the  
23 model are developed from Pender's model of health promotion [23] and Bandura's self-  
24 efficacy theory [24]. The assumption is that development of knowledge and skills reduces  
25 barriers and enhances resources and self-efficacy. This will result in better health promoting  
26 behaviours, such as self-care. Self-efficacy can be defined as an individual's belief in his or  
27 her ability to succeed in a particular situation [24]. Individuals with high self-efficacy have  
28 been found to be more likely to view perceived difficulties, such as self-care activities, as  
29 something to be mastered rather than something to avoid [25]. Gaining knowledge about  
30 disease management is viewed as the basis for the choice of behaviours to sustain and  
31 enhance quality of life [24].

32  
33 A previous intervention programme designed within this model had a cognitive component  
34 delivering information, but the major component focused on improving patient's self-efficacy  
35 by identifying barriers, enhancing resources, increasing support and helping to develop skills  
36 and beliefs in one's own capacity to achieve desired behaviour changes. The programme  
37 included lifestyle-change classes for 8 weeks and telephone follow-up for 3 months. The  
38  
39  
40  
41  
42  
43  
44  
45  
46  
47  
48  
49  
50  
51  
52  
53  
54  
55  
56  
57  
58  
59  
60



1  
2  
3 results showed positive effects regarding health behaviours, health-promoting behaviours,  
4 mental health and pain [22, 26].

5  
6 The model had not previously included partners or families, but as partners provide a lot of  
7 support to patients' self-care, here the model was used for the patient-partner dyad. The  
8 caregiving situation may be considered as a stressor that poses demands and is often  
9 perceived as a stressful or challenging situation for both the partner providing care and the  
10 patient receiving care [27]. Caregiving can be conceptualized as a dyadic interpersonal  
11 interaction that involves both the caregiver's and the patient's perspectives [27].

12  
13 The current intervention focused on problem-solving, information acquisition, self-care  
14 management, and emotional and social support to dyads. The nurses delivering the  
15 intervention assisted the dyads in recognising and modifying factors that contributed to  
16 physical and emotional distress, by supporting them in changing their thoughts and rooted  
17 behaviours and implementing strategies for self-care management and maintenance.

18  
19 The dialogue guide was used as a base for the conversations during three sessions and  
20 included practical, educational and psychosocial topics that were addressed during the nursing  
21 sessions. The result of the interventional study is reported elsewhere [20]. In this study, we set  
22 out to analyse the nurses' documentation from the psycho-educational sessions. This was done  
23 in order to see how the Stuijbergen, Becker [22] model was used during the psycho-  
24 educational intervention provided by nurses to the patient-partner dyads. We also wanted to  
25 obtain a deeper understanding of what topics the dyads found important to discuss with the  
26 nurses and to what extent all parts of the cognitive, supportive and behavioural components of  
27 the model were covered in the dialogues between dyads and nurses.  
28  
29  
30  
31  
32  
33  
34  
35  
36  
37  
38  
39  
40  
41  
42

### 43 **Aim**

44 To describe nurses' documentation of the content in a psycho-educational intervention  
45 inspired by Stuijbergen's model addressing cognitive, supportive and behavioural needs of  
46 patient-partner dyads affected by HF.  
47  
48  
49

### 50 **Design**

51 A descriptive, qualitative design was used to analyse nurses' documentation in dialogue  
52 guides used during sessions at the outpatient clinic with patients affected by HF and their  
53 partners. The study is part of a project aiming at developing and evaluating psycho-  
54  
55  
56  
57  
58  
59  
60

1  
2  
3 educational support to patient-partner dyads affected by HF, ClinicalTrials.gov Identifier:  
4 NCT02398799 [20].  
5  
6  
7

### 8 **Procedure**

9  
10 The research team started by constructing a dialogue guide whose theoretical framework was  
11 based on a conceptual health-promotion model [22, 26], Figure 1. Previous interventions  
12 using the model have a cognitive component delivering information, but the major component  
13 focused on improving the patient's self-efficacy by identifying barriers, increasing support  
14 and developing skills and beliefs in one's capacity to achieve the desired behavioural changes.  
15 In the current study, the dialogue guide included a cognitive, a supportive and a behavioural  
16 component and focused on helping patients and partners to change thoughts and behaviours  
17 and implement strategies for self-care management. All sessions included practical,  
18 educational and psychosocial topics and the dyads were encouraged to speak about all  
19 subjects and concerns they felt they needed to discuss.  
20  
21  
22  
23  
24  
25  
26  
27

28 After construction, the five-page dialogue guide was used during three nursing sessions at the  
29 HF outpatient clinic. The sessions took place between years 2005 and 2008 and were  
30 scheduled 2, 6 and 12 weeks after patients were discharged from hospital after their admission  
31 due to worsening HF. Each session was performed as a discussion and focused on both the  
32 patients' and the partners' situation and experiences, their individual and mutual needs and  
33 expectations. All sessions included HF education to improve the dyads' problem- solving  
34 skills that would help them to recognize and modify factors contributing to psychological and  
35 emotional distress, in order to maintain and strengthen their physical and mental functions and  
36 perceived control, Figure 2. During the sessions, the patient and partner participated as equals  
37 and had the same opportunity to pose questions and speak about their individual concerns.  
38 All four participating HF nurses were experienced in caring for HF patients and had attended  
39 three days of theoretical and practical training on how to deliver the intervention and  
40 document the dialogues, before the study started. On several occasions, the study team visited  
41 the HF clinics and assessed the nurses' competence and study fidelity through observations  
42 and consultations. The study was designed in accordance with the World Medical Association  
43 Declaration of Helsinki and the Code of Ethics for Nurses [28]. Permission was granted by  
44 the Regional Ethical Review Board in Linköping. The nurses and the dyads were informed  
45 that the documentation was planned to be used for research. The nurses all consented verbally  
46 that the material could be analyzed. The dyads of patients and caregivers gave their informed  
47  
48  
49  
50  
51  
52  
53  
54  
55  
56  
57  
58  
59  
60

consent to participating in the study and were aware of that the dialogues were documented and planned to be analysed.

Insert Figure 1. The conceptual health promotion model by Stuijbergen et al., and Figure 2. Cognitive, supportive and behavioural goals for each visit.

### Participants

The dialogue guides from 71 patients with HF and their co-habiting partners were included in the analyses, Table 1. The mean age for the patients was 69 ( $\pm 14$ ) years and partners 67 ( $\pm 12$ ) years, 69% of the patients were male and 55% were found to be in the New York Heart Association function-class III. Regarding employment, 14% of the patients and 33% of the partners worked full time, 86% of the patients and 64% of the partners had a pension/were on sick leave, 3% of the partners were homemakers.

**Table 1. Characteristics of the Participants**

|                               | Patients (n=71) | Partners (n=71) |
|-------------------------------|-----------------|-----------------|
| <b>Sociodemographics</b>      |                 |                 |
| Age, mean $\pm$ SD            | 69 ( $\pm 14$ ) | 67 ( $\pm 12$ ) |
| Female, n (%)                 | 31%             | 69%             |
| <b>NYHA class, n (%)</b>      |                 |                 |
| II                            | 24 (35)         |                 |
| III                           | 40 (55)         |                 |
| IV                            | 7 (10)          |                 |
| <b>Employment, n (%)</b>      |                 |                 |
| Full time                     | 10 (14)         | 22 (33)         |
| Disability pension/sick leave | 13 (17)         | 2 (3)           |
| Homemaker                     | 1 (1)           | 2 (3)           |
| Pension                       | 47 (68)         | 45 (61)         |

### Data collection

The data consisted of the nurses hand-written documentation in the five-page dialogue guides used during the intervention. During each of the three sessions, the nurses documented summaries of the discussions regarding the situation, given information and agreements and described difficulties.

### Data analysis

A directed content analysis was selected for the analysis [29]. Directed content analysis is by nature deductive and is used to validate or extend an existing theory or a model. The analysis is guided by a structured analytic process using existing research where the researcher begins with predetermined concepts as initial predetermined coding categories [30]. These predetermined categories are then used to code the text [29]. In the current study, we wanted to investigate to what extent Stuijbergen's model [22] had been used and could be validated in the context, using the nurses' documentation.

The initial coding categories were based on the areas in the dialogue guide: 1) cognitive components 2) supportive components 3) behavioural components, which were developed from the conceptual health-promotion model [22]. The researchers started by developing operational definitions of the categories, see Table 2.

**Table 2. Coding framework based on the conceptual health promotion model**

| Coding category               | Description                                                                                                                                                                                                                                     |
|-------------------------------|-------------------------------------------------------------------------------------------------------------------------------------------------------------------------------------------------------------------------------------------------|
| <b>Cognitive component</b>    | Texts were coded into this category when statements described lifestyle modifications, medications and symptom management.                                                                                                                      |
| <b>Supportive components</b>  | Texts were coded into this category when statements assessed the patient's or partner's need of support, partner's caregiver burden, modifying caregiver behaviour, strengthening self-care behaviour.                                          |
| <b>Behavioural components</b> | Texts were coded into this category when statements described barriers to lifestyle modifications, strategies to improve or maintain self-care behaviour, intentions, abilities and self-efficacy regarding self-care, planning for the future. |

1  
2  
3 Secondly, the first author (ML) typed out the content in the dialogue guides into a clear copy  
4 and numbered the transcripts so it was possible to see from which dialogue guide they were  
5 derived. To obtain a sense of the whole, transcriptions were read through several times by all  
6 authors. In the next step the text was reviewed and text that described cognitive, supportive or  
7 behavioural components was sorted into one of the predetermined categories.  
8

9  
10 The text in the dialogue guide was validated to be part of the predetermined categories or to  
11 be findings that were new and unknown [29, 31]. Each category was then reviewed and the  
12 content was divided into what were considered to be barriers, resources or self-efficacy, i.e.  
13 the concepts in the model. Finally, we compared the extent to which the data were supported  
14 by Stuijbergen's model versus what represented new aspects not described in the model.  
15  
16  
17  
18  
19

20  
21 The first and the last author conducted the analysis, while the other two authors were involved  
22 in the discussions. Throughout the analysis, there was continuous back and forth movement  
23 between the whole text and the categories, including the concepts of the model, where all  
24 authors scrutinized and repeatedly discussed the results to ensure the trustworthiness of the  
25 data analysis.  
26  
27  
28  
29

### 30 31 **Rigour**

32  
33 In qualitative research, the concepts of credibility, transferability, dependability and  
34 confirmability are considered aspects of trustworthiness [32].  
35

36 In this study, a directed deductive content analysis was chosen to validate an existing model  
37 [22]. Directed content analysis is a structured and systematic analysis process and the method  
38 guides the findings towards existing codes and categories [29]. By using directed content  
39 analysis, trustworthiness can be achieved, as the text is compared with an existing model,  
40 which in turn has gone through a publication process. The systematic way of working with the  
41 analysis and the use of an existing model or theory strengthens the trustworthiness [33].  
42  
43  
44  
45

46 To strengthen the credibility and confirmability different strategies have been used.

47  
48 The nurses' documentation in the dialogue guides has been used verbatim. The texts varied in  
49 depth and length. Some nurses wrote summatively and others described the discussions in  
50 more words. Nevertheless, all dialogue guides provided important and clear information on  
51 the components of dyad functioning as assessed during the sessions. The raw data consisted of  
52 handwritten text, but all nurses had clear handwriting so all data were credible.  
53  
54  
55

56 The results have been discussed and compared to previous research. The authors are all  
57 experienced nurses, and have worked with patients with HF for many years and also met their  
58  
59  
60

1  
2  
3 partners. During the analysis, the material has been read many times and the various  
4 components in the subcategories and the categories were reflected upon and this result can be  
5 seen as a possible interpretation of the data. An analyst triangulation was implied including  
6 both individual coding and consensus discussions in the research team allowing for testing  
7 negative cases and rival explanations.  
8

9  
10  
11 To fulfill dependability the authors maintained a decision trail developing the interview guide,  
12 during data collection, in analysis and also the research team regularly visited the nurses and  
13 assessed their competence to deliver the intervention through observations and consultations.  
14

15  
16 Transferability of the findings was facilitated as the sample; the context and the analysis  
17 process are described in detail. Transferability to similar HF samples is possible since there  
18 were dialogue guides available from 71 dyads, which is a fairly large sample.  
19

20  
21 To ensure confidentiality, neither the names of the participants nor hospitals are published.  
22  
23

### 24 25 **Ethical considerations**

26  
27 The study was approved by the Regional Ethical Review Board in Linköping, Sweden (Study  
28 code 03-568/ M178-04). The nurses at the HF clinic were informed that data would be  
29 analysed for study purposes.  
30  
31

### 32 33 **Results**

34  
35 The findings from the analysis showed that the conceptual health-promotion model by  
36 Stuijbergen et al., [22] was used during the psycho-educational sessions. The analysis  
37 confirmed the three predetermined categories: 1) cognitive components 2) supportive  
38 components 3) behavioural components. The content in the three categories was divided into  
39 the concepts barriers, resources and self-efficacy.  
40  
41  
42  
43  
44

### 45 46 **Cognitive component**

#### 47 **Barriers**

48  
49 The major cognitive barrier for both patients and partners was the described lack of  
50 knowledge. Some patients had received information prior to the sessions but several patients  
51 had no prior knowledge about the disease. They did not know that self-care could be carried  
52 out and affect their well-being although they had lived with the diagnosis for many years.  
53  
54 Others described that they did not really understand that they were sick and the lack of insight  
55 had meant that they had not engaged in self-care activities.  
56  
57  
58  
59  
60

1  
2  
3  
4  
5  
6  
7  
8  
9  
10  
11  
12  
13  
14  
15  
16  
17  
18  
19  
20  
21  
22  
23  
24  
25  
26  
27  
28  
29  
30  
31  
32  
33  
34  
35  
36  
37  
38  
39  
40  
41  
42  
43  
44  
45  
46  
47  
48  
49  
50  
51  
52  
53  
54  
55  
56  
57  
58  
59  
60

Almost none of the partners expressed that they had prior knowledge and therefore they had not been involved in the patients' self-care activities. A few partners had searched for information about HF on the Internet, but found many websites were lacking practical information which became more of a cognitive barrier than a resource in daily living. As they discussed their expectations of the sessions, the dyads expressed a broad range of expectations varying from a wish and belief that the patient would be cured, to the other side of the coin; that it does not matter what we do because both body and heart are too old and too sick. Also a few partners did not want to know anything about HF because it made them feel worried and uneasy.

### **Resources**

Cognitive resources were found when the dyads expressed a wish to learn about HF. During the first session, both patients and partners posed general questions about HF treatment, causes and prognosis after receiving a general knowledge overview from the nurse. However, with increased knowledge, both patients' and partners' questions were more specific regarding how to perform self-care activities on a daily basis.

### **Self-efficacy**

During the sessions, the dyads described that they had enhanced their knowledge and had greater confidence to handle their situation. The patients felt they have had an opportunity to pose questions and now had in-depth knowledge of the disease and, due to that, the confidence to act had increased.

Partners felt they had received guidance regarding exercise, for example how much someone who has HF can walk without it becoming harmful. So now they encouraged the patient to exercise. They also learned about and felt confident in how to act in case of deterioration and how deterioration could be prevented.

### **Supportive component**

#### **Barrier**

Supportive barriers could be both emotional and practical, and both patients and partners described that they often lacked support. Examples of emotional barriers were that due to anxiety and consideration, some partners tried to set limits to physical activity so patients did

1  
2  
3 not overstrain themselves. When patients felt overprotected this sometimes led to tension and  
4 conflicts in the relationship. During the discussions, the nurses helped and guided dyads to  
5 communicate their thoughts and concerns with each other.  
6  
7

8 Another barrier was loss of friends' due to the disease. Patients could no longer socialize as  
9 before and therefore the partner had less social support, activities and interactions. The dyads  
10 became isolated since the partner did not want to leave patient alone and do things on their  
11 own.  
12  
13

14 Dyads described a lack of good healthcare contacts. Nurses' documentation revealed that  
15 many patients were sad and depressed over their situation. Partners described a worry and  
16 asked for long-term guidance from healthcare professionals to learn how to offer support.  
17 Since several partners had no previous knowledge about the disease, the sessions brought up  
18 many thoughts for example that they needed the nurse's support to process.  
19  
20  
21  
22

23 The dyads expressed a wish for further, regular visits at the HF outpatient clinic. The visits  
24 had created security for both patient and partner and they expressed anxiety when the possibly  
25 to contact the nurses would end. The visits had made them feel secure and they knew they had  
26 someone they could contact when questions arose.  
27  
28  
29  
30

31 A practical, supportive barrier was if the partner also had some illness and therefore was not  
32 able to provide support to the patient with HF, and maybe instead needed help and support  
33 themselves. Need of formal support from someone outside the family arose primarily if both  
34 patient and partner had difficulty carrying out practical tasks, such as driving or managing the  
35 household.  
36  
37  
38

39 Some dyads experienced hopelessness when the future was discussed and patients were  
40 perceived as depressed in the nurses' documentation. Some patients expressed a need for  
41 contact with a social worker; others were in continuous need of support from homecare.  
42  
43  
44  
45

#### 46 **Resources**

47 Many dyads said that they helped each other and shared the chores on the basis of strength  
48 and ability. With increased knowledge, they seemed to understand better why it is important  
49 to perform self-care activities, and for some patients this led to a need of support from the  
50 partner. Partners wished to learn and become more involved in the care and help with  
51 decision-making on a daily basis.  
52  
53  
54  
55  
56  
57  
58  
59  
60



1  
2  
3 The need for support increased when patients were depressed or suffered from multi-  
4 morbidity. Some patients had previously had contact with a social worker and have, due to  
5 these visits, been helped to accept their situation.  
6  
7  
8

### 9 10 **Self-efficacy**

11 The documentation described that many partners give plenty of practical support, but also  
12 how they encouraged patients to take own responsibility. Also, when the partner had  
13 knowledge and the patient was motivated, confidence in their own abilities increased in both  
14 patients and partners.  
15  
16  
17

### 18 19 20 **Behavioural component**

#### 21 **Barrier**

22 A behavioural barrier was patients' lack of strength, which led to involuntary inactivity. Both  
23 patients and partners felt that partners had to take on more of the workload in the household.  
24 The additional burden was described as mentally exhausting for the partners due to a greater  
25 responsibility.  
26  
27

28 Some dyads described that the new roles led to conflicts and fractions in the relationship.  
29 Partners thought it was difficult to leave the patient alone and that they had to hurry home  
30 from work, leaving no time for own activities.  
31

32 Some patients found it hard to follow dietary advice, to weigh themselves daily and to  
33 monitor and assess HF signs and symptoms. For some dyads, HF had been a barrier for  
34 sexuality, where the patient no longer has the energy and the partner no longer dares to have a  
35 sexual relation. The documentation did not reveal how the nurse discussed the perceived  
36 sexual difficulties with the dyads.  
37  
38  
39  
40  
41  
42  
43  
44

#### 45 **Resources**

46 Most patients wished to take the main responsibility to manage their self-care, but sometimes  
47 were lacking confidence in their own ability and doubting the effect of self-care advices.  
48 When seeing the effects of their self-care activities, the patients' confidence to manage self-  
49 care increased.  
50  
51  
52

53  
54  
55 For some dyads, the new roles had strengthened the relationship. They collaborated to follow  
56 instructions about behavioural changes and provided mutual support to each other. In some  
57  
58  
59  
60

1  
2  
3 relationships, the partner functioned as a resource for the patient, someone to discuss  
4 strategies with. Other partners provided help with self-care on a daily basis.  
5  
6

### 7 8 **Self-efficacy**

9  
10 During the last visit, the nurses assessed that most of the dyads had a good understanding  
11 about HF. They had confidence when following the self-care advice given during the sessions  
12 and had gradually adapted to the situation. Adaptations could, for example, be a change of  
13 accommodation or partner's employment.  
14  
15  
16  
17  
18  
19

### 20 **Discussion**

21 Our study showed that the model developed by Stuifbergen et al., [22], covering cognitive,  
22 supportive and behavioural components of dyad functioning, was fully addressed during the  
23 nursing sessions. The findings revealed a wide range of cognitive, supportive and behavioural  
24 needs among the dyads. The model highlights the importance of identifying and discussing  
25 barriers, resources and self-efficacy to increase the dyads health-promoting behaviours.  
26  
27  
28

29 For some dyads, the new roles had strengthened their relationship; patients and partners  
30 collaborated and provided mutual support to each other. It is known that supporting a person  
31 with HF involves several salient changes in daily life and includes both benefits and burdens.  
32 It represents an opportunity for increased intimacy with the person who is ill. Care-giving is  
33 sometimes experienced as rewarding and provides satisfaction and hopes for a positive future  
34 [34, 35].  
35  
36  
37  
38  
39

40 The nurses' documentation showed that most patients found great support in their partners  
41 and partners provided both practical and emotional support. Caregiver support is known to  
42 improve self-care and strengthen patients' adherence to medical treatment and maintaining a  
43 healthy lifestyle [3, 36, 37]. However, one recent study found the contrary. Cocchieri and  
44 colleagues [38] found that having a caregiver was associated with poor self-care maintenance.  
45 They concluded that their result might be due to the fact that patients having a partner were  
46 more cognitive and functionally impaired, had higher co-morbidity and were in need of more  
47 care.  
48  
49  
50  
51  
52  
53

54 Caregiving may sometimes be experienced as burdensome for the partner. Partners in the  
55 current study described their having taken over much of the household workload and helped  
56  
57  
58  
59  
60

1  
2  
3 the patients with practical tasks regarding the patient's self-care management and for some it  
4 meant a burden. One third of partners of patients with HF perceive moderate caregiver burden  
5 and could be at higher risk of worsened health [11]. As in previous research, partners  
6 sacrificed their own needs in order to support care for the patient. Partners perceived a need  
7 for support with daily living as well as easy access to the healthcare providers [39]. To reduce  
8 caregiver burden, interventions should focus on improving social support and provide  
9 knowledge of HF to both patients and caregivers to increase their perceived control over the  
10 situation [34].  
11  
12  
13  
14  
15  
16

17  
18 With the increasing awareness of patient needs, there are a lot of educational moments in  
19 most current HF care. However, it still seems important to consider cognitive aspects during  
20 nursing sessions. Patients felt that they had never received information about their illness  
21 previously. One reason could be that they had suffered from HF for many years and only  
22 received education at the time of the diagnosis, and now the information has been forgotten.  
23 Another reason could be that there is a high occurrence of mild cognitive deficits among  
24 patients with HF without known cognitive diseases or disorders [40]. This calls for repeated  
25 information and follow-ups and close attention should be paid to the patient's self-care  
26 abilities and compliance, as inadequate self-care activities could lead to repeated  
27 hospitalisations. Cognitive impairment presents a barrier to the complex medication and self-  
28 care management that is required in HF treatment [41]. Due to this, both patients and  
29 caregivers perceive a need to have a long-term healthcare contact they can turn to when  
30 questions arise [39, 42]. This is supported in the present results where the dyads expressed a  
31 need for long-term support from nurses, and for some, also homecare and social workers.  
32  
33  
34  
35  
36  
37  
38  
39  
40  
41  
42

43 The behavioural component includes self-care abilities, and a prerequisite for self-care  
44 adherence is to gain knowledge. Self-care has been defined as a naturalistic decision-making  
45 process which influences actions that maintain physiologic stability, facilitates the perception  
46 of symptoms and directs the management of symptoms [43]. Patients and partners need to  
47 learn about HF to become active participants in the management of the illness but sometimes  
48 their own knowledge was not enough and then the dyads wanted easy access to healthcare.  
49 Long-term support was highlighted as an important factor to remain being perceived as  
50 healthy and experiencing well-being. Previous research has also addressed both patients' and  
51 caregivers' need for a regular healthcare contact they can easily contact, as they currently  
52 experience difficulties both navigating for and assessing support [44]. Today, a lot of different  
53  
54  
55  
56  
57  
58  
59  
60

1  
2  
3 healthcare professionals (primary care physicians and nurses, cardiologists and HF nurses)  
4 could be involved in the care for HF patients. Patients and caregivers have to decide who to  
5 contact based on their previous experiences, which is perceived as confusing and leads to  
6 insecurity. Instead, to have a permanent healthcare contact they can turn to if necessary would  
7 facilitate daily life.  
8  
9  
10

## 11 **Limitations**

12  
13  
14 In qualitative research, generalisability of the findings may be restricted to a particular setting  
15 or context. However, the current study findings are consistent with previous research using  
16 the model [22] in a different setting and for patients with Multiple Sclerosis.  
17

18  
19 The nurses were informed beforehand that their documentation was going to be analysed. The  
20 nurses' documentation in the dialogue guides was transcribed verbatim. The text varied in  
21 depth and length. Some nurses wrote summatively and others described the discussions in  
22 more words. Nevertheless, all dialogue guides were found to provide important and clear  
23 information on the components of dyad functioning as assessed during the sessions.  
24

25  
26 The raw data consisted of handwritten text which may affect credibility. However, all nurses  
27 had clear handwriting so all data were considered accurate.  
28

29  
30 The data were collected between the years 2005 and 2008. There have been some changes in  
31 HF treatment since then, however the importance of self-care and family support has been  
32 increasingly acknowledged in guidelines, [1] thus making this study even more relevant today  
33 than when the data were collected. Further, since the aim of the study was to describe nurses'  
34 documentation regarding a psycho-educational intervention inspired by a health promotion  
35 model, the data are still valid and of interest. To date, there are still very few models or  
36 theory-based interventions for patients and partners living with HF [17, 45], and our results  
37 can hopefully serve as an example and inspiration for further research in this area.  
38  
39  
40  
41  
42  
43  
44  
45  
46  
47

## 48 **Conclusion**

49  
50 This study described how cognitive, supportive and behavioural components of dyad  
51 functioning were addressed during nursing sessions with dyads affected by HF.  
52

53 We found the model to be suitable for helping patient-partner HF dyads to gain knowledge  
54 and develop skills to handle living with HF. The model promoted healthy and supportive  
55 behaviours i.e. to improve self-care. The results show the importance of providing continuous  
56 healthcare contacts throughout the illness trajectory. The findings emphasise that gaining  
57  
58  
59  
60

1  
2  
3 knowledge of HF is not enough. It also seems clear that one type of intervention does not fits  
4 all dyads, as a variety of equal and diverse needs emerged during the analysis and when the  
5 needs were met the dyads developed self-efficacy. It is important that healthcare providers  
6 take time to discuss all aspects related to the disease that are of importance for the dyad to  
7 support improved self-efficacy and reduce insecurity. Furthermore, the model was applicable  
8 for dyads consisting of a patient with HF and their partner, not only for patients alone as  
9 shown in previous studies implementing the model.

10  
11 The result can inspire others when using this model or designing new psychoeducational dyad  
12 interventions. The findings provide practical examples of cognitive, supportive and  
13 behavioural needs, which need to be considered when meeting patients and partners affected  
14 by HF. This knowledge can be applied in HF units to develop a dyad educational regime.  
15  
16  
17  
18  
19  
20  
21  
22  
23  
24  
25  
26  
27  
28  
29  
30  
31  
32  
33  
34  
35  
36  
37  
38  
39  
40  
41  
42  
43  
44  
45  
46  
47  
48  
49  
50  
51  
52  
53  
54  
55  
56  
57  
58  
59  
60

## References

1. Ponikowski, P., et al., *2016 ESC Guidelines for the diagnosis and treatment of acute and chronic heart failure: The Task Force for the diagnosis and treatment of acute and chronic heart failure of the European Society of Cardiology (ESC). Developed with the special contribution of the Heart Failure Association (HFA) of the ESC.* Eur J Heart Fail, 2016.
2. Riegel, B., et al., *State of the science: promoting self-care in persons with heart failure: a scientific statement from the American Heart Association.* Circulation, 2009. **120**(12): p. 1141-63.
3. Buck, H.G., et al., *Caregivers' contributions to heart failure self-care: A systematic review.* Eur J Cardiovasc Nurs, 2014.
4. Clark, A.M., et al., *Determinants of effective heart failure self-care: a systematic review of patients' and caregivers' perceptions.* Heart, 2014. **100**(9): p. 716-21.
5. Molloy, G.J., D.W. Johnston, and M.D. Witham, *Family caregiving and congestive heart failure. Review and analysis.* Eur J Heart Fail, 2005. **7**(4): p. 592-603.
6. Dinesen, B., et al., *Under surveillance, yet looked after: telehomecare as viewed by patients and their spouse/partners.* Eur J Cardiovasc Nurs, 2008. **7**(3): p. 239-46.
7. Lamura, G., et al., *Family carers' experiences using support services in Europe: empirical evidence from the EUROFAMCARE study.* Gerontologist, 2008. **48**(6): p. 752-71.
8. Daugherty, J., et al., *Can we talk? Developing a social support nursing intervention for couples.* Clin Nurse Spec, 2002. **16**(4): p. 211-8.
9. Ohman, M. and S. Soderberg, *The experiences of close relatives living with a person with serious chronic illness.* Qual Health Res, 2004. **14**(3): p. 396-410.
10. Rees, J., C. O'Boyle, and R. MacDonagh, *Quality of life: impact of chronic illness on the partner.* J R Soc Med, 2001. **94**(11): p. 563-6.
11. Agren, S., L. Evangelista, and A. Stromberg, *Do partners of patients with chronic heart failure experience caregiver burden?* Eur J Cardiovasc Nurs, 2010. **9**(4): p. 254-62.
12. Luttik, M.L., et al., *Caregiver burden in partners of Heart Failure patients; limited influence of disease severity.* Eur J Heart Fail, 2007. **9**(6-7): p. 695-701.
13. Dunbar, S.B., et al., *Family education and support interventions in heart failure: a pilot study.* Nurs Res, 2005. **54**(3): p. 158-66.
14. Stromberg, A., *The crucial role of patient education in heart failure.* Eur J Heart Fail, 2005. **7**(3): p. 363-9.
15. Srisuk, N., et al., *Heart failure family-based education: a systematic review.* Patient Educ Couns, 2016. **99**(3): p. 326-38.
16. Evangelista, L.S., A. Stromberg, and J.N. Dionne-Odom, *An integrated review of interventions to improve psychological outcomes in caregivers of patients with heart failure.* Curr Opin Support Palliat Care, 2016. **10**(1): p. 24-31.
17. Dunbar, S.B., et al., *A trial of family partnership and education interventions in heart failure.* J Card Fail, 2013. **19**(12): p. 829-41.
18. Lofvenmark, C., et al., *Evaluation of an educational programme for family members of patients living with heart failure: a randomised controlled trial.* J Clin Nurs, 2013. **22**(1-2): p. 115-26.
19. Etemadifar, S., et al., *The effectiveness of a supportive educative group intervention on family caregiver burden of patients with heart failure.* Iran J Nurs Midwifery Res, 2014. **19**(3): p. 217-23.
20. Liljeroos, M., et al., *Long Term Follow-Up after a Randomized Integrated Educational and Psychosocial Intervention in Patient-Partner Dyads Affected by Heart Failure.* PLoS One, 2015. **10**(9): p. e0138058.
21. Ryan, R.M. and E.L. Deci, *Self-determination theory and the facilitation of intrinsic motivation, social development, and well-being.* Am Psychol, 2000. **55**(1): p. 68-78.

- 1  
2  
3  
4  
5  
6  
7  
8  
9  
10  
11  
12  
13  
14  
15  
16  
17  
18  
19  
20  
21  
22  
23  
24  
25  
26  
27  
28  
29  
30  
31  
32  
33  
34  
35  
36  
37  
38  
39  
40  
41  
42  
43  
44  
45  
46  
47  
48  
49  
50  
51  
52  
53  
54  
55  
56  
57  
58  
59  
60
22. Stuifbergen, A., et al., *Promoting wellness for women with multiple sclerosis*. J Neurosci Nurs, 1999. **31**(2): p. 73-9.
  23. Pender, N.J. and A.R. Pender, *Health promotion in nursing practice*. 2nd ed. 1987, Norwalk, Conn.: Appleton & Lange. xii, 497 p.
  24. Bandura, A., *Self-efficacy: toward a unifying theory of behavioral change*. Psychol Rev, 1977. **84**(2): p. 191-215.
  25. Bandura, A., *Self-efficacy: The exercise of control*. 1997, New York: W.H. Freeman.
  26. Stuifbergen, A.K., et al., *A randomized clinical trial of a wellness intervention for women with multiple sclerosis*. Arch Phys Med Rehabil, 2003. **84**(4): p. 467-76.
  27. Revenson, T.A., et al., *Caregiving in the Illness Context*. 2016.
  28. A, W.M., *World medical association declaration of helsinki: Ethical principles for medical research involving human subjects*. JAMA, 2013. **310**(20): p. 2191-2194.
  29. Hsieh, H.F. and S.E. Shannon, *Three approaches to qualitative content analysis*. Qual Health Res, 2005. **15**(9): p. 1277-88.
  30. Potter, W.J. and D. Levine-Donnerstein, *Rethinking validity and reliability in content analysis*. Journal of Applied Communication Research, 1999. **27**(3): p. 258-284.
  31. Elo, S. and H. Kyngas, *The qualitative content analysis process*. J Adv Nurs, 2008. **62**(1): p. 107-15.
  32. Patton, M.Q., *Qualitative research & evaluation methods*. 2002, London: SAGE.
  33. Lincoln, Y. and E. Guba, *Naturalistic inquiry*. 1985, Newbury Park, London: Sage Publications Inc.
  34. Stromberg, A., *The situation of caregivers in heart failure and their role in improving patient outcomes*. Curr Heart Fail Rep, 2013. **10**(3): p. 270-5.
  35. Duggleby, W., et al., *Metasynthesis of the hope experience of family caregivers of persons with chronic illness*. Qual Health Res, 2010. **20**(2): p. 148-58.
  36. Gallagher, R., M.L. Luttik, and T. Jaarsma, *Social support and self-care in heart failure*. J Cardiovasc Nurs, 2011. **26**(6): p. 439-45.
  37. Pressler, S.J., et al., *Family caregivers of patients with heart failure: a longitudinal study*. J Cardiovasc Nurs, 2013. **28**(5): p. 417-28.
  38. Cocchieri, A., et al., *Describing self-care in Italian adults with heart failure and identifying determinants of poor self-care*. Eur J Cardiovasc Nurs, 2015. **14**(2): p. 126-36.
  39. Doherty, L.C., D. Fitzsimons, and S.J. McIlfratrick, *Carers' needs in advanced heart failure: A systematic narrative review*. Eur J Cardiovasc Nurs, 2015.
  40. Nordlund, A., et al., *Frequent mild cognitive deficits in several functional domains in elderly patients with heart failure without known cognitive disorders*. J Card Fail, 2015.
  41. Cannon, J.A., J.J. McMurray, and T.J. Quinn, *'Hearts and minds': association, causation and implication of cognitive impairment in heart failure*. Alzheimers Res Ther, 2015. **7**(1): p. 22.
  42. Liljeroos, M., et al., *Perceived caring needs in patient-partner dyads affected by heart failure: A qualitative study*. J Clin Nurs, 2014.
  43. Riegel, B., V.V. Dickson, and K.M. Faulkner, *The Situation-Specific Theory of Heart Failure Self-Care: Revised and Updated*. J Cardiovasc Nurs, 2015.
  44. Browne, S., et al., *Patient, carer and professional perspectives on barriers and facilitators to quality care in advanced heart failure*. PLoS One, 2014. **9**(3): p. e93288.
  45. Sebern, M.D. and A. Woda, *Shared care dyadic intervention: outcome patterns for heart failure care partners*. West J Nurs Res, 2012. **34**(3): p. 289-316.

1  
2  
3  
4  
5  
6  
7  
8  
9  
10  
11 CONTRIBUTORSHIP STATEMENT

12 SÅ and ML collected the data. ML was mainly responsible for analysing data and drafting the  
13 manuscript and SÅ, TJ and AS contributed to the data analysis and writing the manuscript.  
14 AS and TJ conceptualised and developed the idea for the study as part of the broader research  
15 programme. All authors critically edited the manuscript and read and approved the final  
16 version.  
17  
18  
19

20  
21  
22 Funding

23 This research received no specific grant from any funding agency in the public, commercial or  
24 not-for-profit sectors.  
25  
26  
27

28  
29 Competing interests

30 None declared.  
31  
32  
33

34 Ethics approval

35 The study was approved by the Regional Ethical Review Board in Linköping, Sweden (Study  
36 code 03-568/ M178-04).  
37  
38  
39

40 Data-sharing statement

41 No additional data are available.  
42  
43  
44  
45  
46  
47  
48  
49  
50  
51  
52  
53  
54  
55  
56  
57  
58  
59  
60



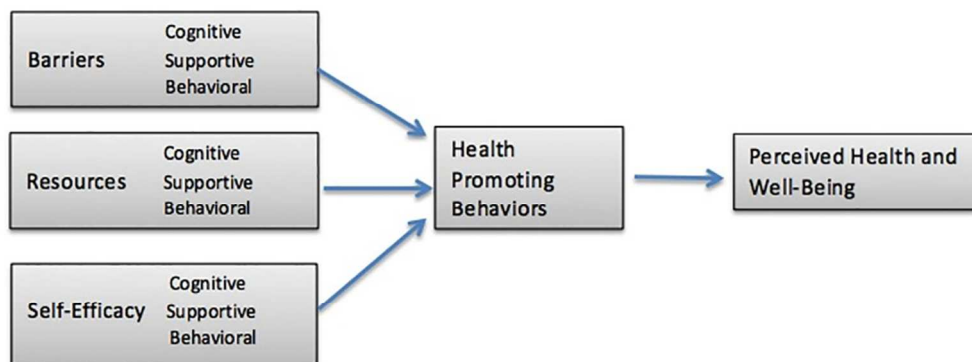

Figure 1. The conceptual health promotion model by Stuijbergen et al.

104x41mm (300 x 300 DPI)

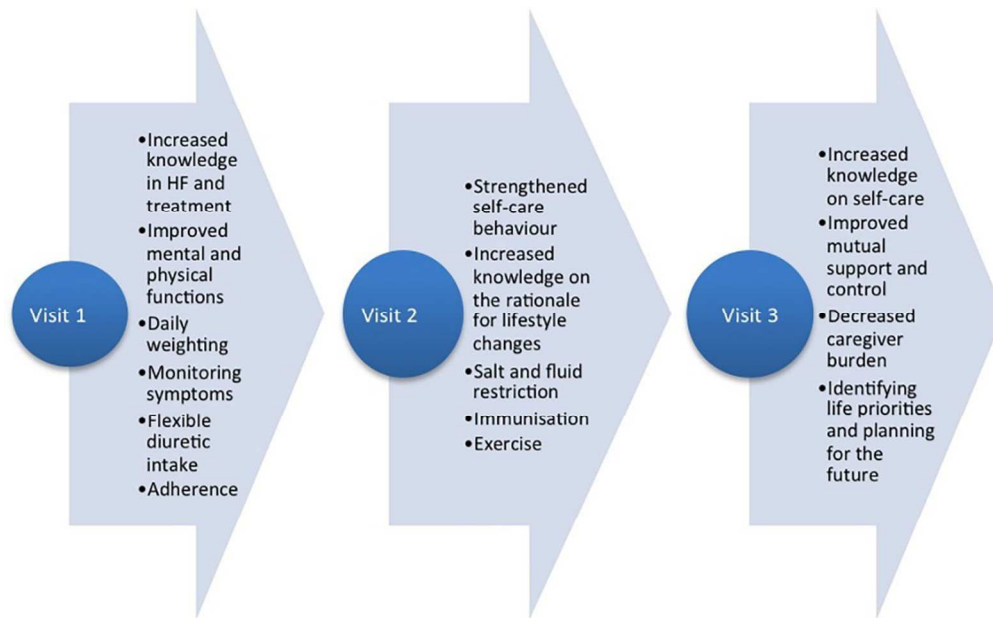

Figure 2. Cognitive, supportive and behavioural goals for each visit.

104x64mm (300 x 300 DPI)

## Consolidated criteria for reporting qualitative studies (COREQ): 32-item checklist

Developed from:

Tong A, Sainsbury P, Craig J. Consolidated criteria for reporting qualitative research (COREQ): a 32-item checklist for interviews and focus groups. *International Journal for Quality in Health Care*. 2007. Volume 19, Number 6: pp. 349 – 357

**YOU MUST PROVIDE A RESPONSE FOR ALL ITEMS. ENTER N/A IF NOT APPLICABLE**

| No. Item                                       | Guide questions/description                                                                                                                              | Reported on Page # |
|------------------------------------------------|----------------------------------------------------------------------------------------------------------------------------------------------------------|--------------------|
| <b>Domain 1: Research team and reflexivity</b> |                                                                                                                                                          |                    |
| <i>Personal Characteristics</i>                |                                                                                                                                                          |                    |
| 1. Interviewer/facilitator                     | Which author/s conducted the interview or focus group?                                                                                                   | 7                  |
| 2. Credentials                                 | What were the researcher's credentials?<br>E.g. PhD, MD                                                                                                  | 7, Title page      |
| 3. Occupation                                  | What was their occupation at the time of the study?                                                                                                      | 7, Title page      |
| 4. Gender                                      | Was the researcher male or female?                                                                                                                       | Title page         |
| 5. Experience and training                     | What experience or training did the researcher have?                                                                                                     | 7                  |
| <i>Relationship with participants</i>          |                                                                                                                                                          |                    |
| 6. Relationship established                    | Was a relationship established prior to study commencement?                                                                                              | 7                  |
| 7. Participant knowledge of the interviewer    | What did the participants know about the researcher? e.g. personal goals, reasons for doing the research                                                 | 7                  |
| 8. Interviewer characteristics                 | What characteristics were reported about the interviewer/facilitator? e.g. Bias, assumptions, reasons and interests in the research topic                | NA                 |
| <b>Domain 2: study design</b>                  |                                                                                                                                                          |                    |
| <i>Theoretical framework</i>                   |                                                                                                                                                          |                    |
| 9. Methodological orientation and Theory       | What methodological orientation was stated to underpin the study? e.g. grounded theory, discourse analysis, ethnography, phenomenology, content analysis | 8                  |
| <i>Participant selection</i>                   |                                                                                                                                                          |                    |
| 10. Sampling                                   | How were participants selected? e.g. purposive, convenience, consecutive, snowball                                                                       | NA                 |
| 11. Method of approach                         | How were participants approached? e.g. face-to-face, telephone, mail, email                                                                              | NA                 |
| 12. Sample size                                | How many participants were in the study?                                                                                                                 | 7                  |

|                                        |                                                                                                                                 |       |
|----------------------------------------|---------------------------------------------------------------------------------------------------------------------------------|-------|
| 13. Non-participation                  | How many people refused to participate or dropped out? Reasons?                                                                 | NA    |
| <i>Setting</i>                         |                                                                                                                                 |       |
| 14. Setting of data collection         | Where was the data collected? e.g. home, clinic, workplace                                                                      | 6-7   |
| 15. Presence of non-participants       | Was anyone else present besides the participants and researchers?                                                               | 6-7   |
| 16. Description of sample              | What are the important characteristics of the sample? e.g. demographic data, date                                               | 7-8   |
| <i>Data collection</i>                 |                                                                                                                                 |       |
| 17. Interview guide                    | Were questions, prompts, guides provided by the authors? Was it pilot tested?                                                   | 6     |
| 18. Repeat interviews                  | Were repeat inter views carried out? If yes, how many?                                                                          | NA    |
| 19. Audio/visual recording             | Did the research use audio or visual recording to collect the data?                                                             | 8     |
| 20. Field notes                        | Were field notes made during and/or after the inter view or focus group?                                                        | 8     |
| 21. Duration                           | What was the duration of the inter views or focus group?                                                                        | NA    |
| 22. Data saturation                    | Was data saturation discussed?                                                                                                  | NA    |
| 23. Transcripts returned               | Were transcripts returned to participants for comment and/or correction?                                                        | NA    |
| <b>Domain 3: analysis and findings</b> |                                                                                                                                 |       |
| <i>Data analysis</i>                   |                                                                                                                                 |       |
| 24. Number of data coders              | How many data coders coded the data?                                                                                            | 19    |
| 25. Description of the coding tree     | Did authors provide a description of the coding tree?                                                                           | 8     |
| 26. Derivation of themes               | Were themes identified in advance or derived from the data?                                                                     | 8     |
| 27. Software                           | What software, if applicable, was used to manage the data?                                                                      | NA    |
| 28. Participant checking               | Did participants provide feedback on the findings?                                                                              | NA    |
| <i>Reporting</i>                       |                                                                                                                                 |       |
| 29. Quotations presented               | Were participant quotations presented to illustrate the themes/findings? Was each quotation identified? e.g. participant number | NA    |
| 30. Data and findings consistent       | Was there consistency between the data presented and the findings?                                                              | 11-14 |
| 31. Clarity of major themes            | Were major themes clearly presented in the findings?                                                                            | 11-14 |
| 32. Clarity of minor themes            | Is there a description of diverse cases or discussion of minor themes?                                                          | 11-14 |

Once you have completed this checklist, please save a copy and upload it as part of your submission. When requested to do so as part of the upload process, please select the file type: *Checklist*. You will NOT be able to proceed with

1  
2  
3 **submission unless the checklist has been uploaded. Please DO NOT include this**  
4 **checklist as part of the main manuscript document. It must be uploaded as a**  
5 **separate file.**  
6  
7  
8  
9  
10  
11  
12  
13  
14  
15  
16  
17  
18  
19  
20  
21  
22  
23  
24  
25  
26  
27  
28  
29  
30  
31  
32  
33  
34  
35  
36  
37  
38  
39  
40  
41  
42  
43  
44  
45  
46  
47  
48  
49  
50  
51  
52  
53  
54  
55  
56  
57  
58  
59  
60

For peer review only
